# Supplementary material for: The Evaluation of Municipal Waste in Counties in Poland with the Use of the Theory of Phenomena Spatial Concentration
Source: MDPI journal article supplement (doi:10.3390/ijerph17239107), 2020-12-06
Supplement: s1 [file s1]

**Table S1.** The values of the location quotients ( $LQ$ ) for selected waste in comparison with all municipal waste in counties in Poland

| No. voivodeship | Voivodeship   | Counties            | Location quotient ( $LQ$ ) |
|-----------------|---------------|---------------------|----------------------------|
| 1.              | Lower Silesia | 1. bolesławiecki    | 1.012                      |
|                 |               | 2. dzierżoniowski   | 0.545                      |
|                 |               | 3. głogowski        | 0.631                      |
|                 |               | 4. górowski         | 0.625                      |
|                 |               | 5. jaworski         | 0.630                      |
|                 |               | 6. jeleniogórski    | 0.894                      |
|                 |               | 7. kamiennogórski   | 0.650                      |
|                 |               | 8. kłodzki          | 0.592                      |
|                 |               | 9. legnicki         | 0.978                      |
|                 |               | 10. lubański        | 0.938                      |
|                 |               | 11. lubiński        | 0.666                      |
|                 |               | 12. lwówecki        | 1.061                      |
|                 |               | 13. milicki         | 0.897                      |
|                 |               | 14. oleśnicki       | 1.109                      |
|                 |               | 15. oławski         | 0.393                      |
|                 |               | 16. polkowicki      | 0.911                      |
|                 |               | 17. strzeliński     | 0.832                      |
|                 |               | 18. średzki         | 0.785                      |
|                 |               | 19. świdnicki       | 0.772                      |
|                 |               | 20. trzebnicki      | 1.223                      |
|                 |               | 21. wałbrzyski      | 0.590                      |
|                 |               | 22. wołowski        | 1.015                      |
|                 |               | 23. wrocławski      | 1.107                      |
|                 |               | 24. ząbkowicki      | 0.590                      |
|                 |               | 25. zgorzelecki     | 0.669                      |
|                 |               | 26. złotoryjski     | 0.732                      |
|                 |               | 27. c. Jelenia Góra | 0.488                      |
|                 |               | 28. c. Legnica      | 0.836                      |

|    |                      |                         |       |
|----|----------------------|-------------------------|-------|
|    |                      | 29. c. Wrocław          | 1.049 |
|    |                      | 30. c. Wałbrzych        | 0.073 |
| 2. | Kujawy and Pomerania | 31. aleksandrowski      | 1.060 |
|    |                      | 32. brodnicki           | 0.855 |
|    |                      | 33. bydgoski            | 1.183 |
|    |                      | 34. chełmiński          | 0.727 |
|    |                      | 35. golubsko-dobrzyński | 0.756 |
|    |                      | 36. grudziądzki         | 0.766 |
|    |                      | 37. inowrocławski       | 0.816 |
|    |                      | 38. lipnowski           | 1.406 |
|    |                      | 39. mogileński          | 0.877 |
|    |                      | 40. nakielski           | 0.675 |
|    |                      | 41. radziejowski        | 0.864 |
|    |                      | 42. rypiński            | 0.752 |
|    |                      | 43. sępoleński          | 1.018 |
|    |                      | 44. świecki             | 0.867 |
|    |                      | 45. toruński            | 1.106 |
|    |                      | 46. tucholski           | 1.363 |
|    |                      | 47. wąbrzeski           | 1.041 |
|    |                      | 48. włocławski          | 1.511 |
|    |                      | 49. żniński             | 0.746 |
|    |                      | 50. c. Bydgoszcz        | 1.235 |
| 3. | Lublin               | 51. c. Grudziądz        | 1.064 |
|    |                      | 52. c. Toruń            | 0.705 |
|    |                      | 53. c. Włocławek        | 0.931 |
|    |                      | 54. bialski             | 1.821 |
|    |                      | 55. biłgorajski         | 1.204 |
|    |                      | 56. chełmski            | 1.719 |
|    |                      | 57. hrubieszowski       | 0.852 |
|    |                      | 58. janowski            | 0.816 |

|    |          |                            |       |
|----|----------|----------------------------|-------|
|    |          | 59. krasnostawski          | 0.872 |
|    |          | 60. kraśnicki              | 1.057 |
|    |          | 61. lubartowski            | 1.036 |
|    |          | 62. lubelski               | 1.070 |
|    |          | 63. łęczyński              | 0.996 |
|    |          | 64. łukowski               | 1.850 |
|    |          | 65. opolski                | 0.964 |
|    |          | 66. parczewski             | 1.896 |
|    |          | 67. puławski               | 1.101 |
|    |          | 68. radzyński              | 1.956 |
|    |          | 69. rycki                  | 0.960 |
|    |          | 70. świdnicki              | 0.996 |
|    |          | 71. tomaszowski            | 1.302 |
|    |          | 72. włodawski              | 1.211 |
|    |          | 73. zamojski               | 1.212 |
|    |          | 74. c. Biała Podlaska      | 0.751 |
|    |          | 75. c. Chełm               | 1.218 |
|    |          | 76. c. Lublin              | 0.971 |
|    |          | 77. c. Zamość              | 0.987 |
| 4. | Lubuskie | 78. gorzowski              | 0.783 |
|    |          | 79. krośnieński            | 0.768 |
|    |          | 80. międzyrzecki           | 0.614 |
|    |          | 81. nowosolski             | 1.338 |
|    |          | 82. słubicki               | 0.712 |
|    |          | 83. strzelecko-drezdenecki | 0.424 |
|    |          | 84. sulęciński             | 1.019 |
|    |          | 85. świebodziński          | 0.666 |
|    |          | 86. zielonogórski          | 0.990 |
|    |          | 87. żagański               | 0.633 |
|    |          | 88. żarski                 | 0.832 |

|    |            |                              |       |
|----|------------|------------------------------|-------|
|    |            | 89. wschowski                | 1.126 |
|    |            | 90. c. Gorzów Wielkopolski   | 0.729 |
|    |            | 91. c. Zielona Góra          | 0.727 |
| 5. | Łódź       | 92. bełchatowski             | 1.279 |
|    |            | 93. kutnowski                | 1.158 |
|    |            | 94. łaski                    | 1.530 |
|    |            | 95. łęczycki                 | 0.638 |
|    |            | 96. łowicki                  | 0.824 |
|    |            | 97. łódzki wschodni          | 1.144 |
|    |            | 98. opoczyński               | 0.917 |
|    |            | 99. pabianicki               | 1.424 |
|    |            | 100. pajęczański             | 1.016 |
|    |            | 101. piotrkowski             | 1.212 |
|    |            | 102. poddębicki              | 0.543 |
|    |            | 103. radomszczański          | 0.845 |
|    |            | 104. rawski                  | 0.653 |
|    |            | 105. sieradzki               | 1.000 |
|    |            | 106. skierniewicki           | 1.483 |
|    |            | 107. tomaszowski             | 0.727 |
|    |            | 108. wieluński               | 0.979 |
|    |            | 109. wieruszowski            | 1.156 |
|    |            | 110. zduńskowolski           | 1.028 |
|    |            | 111. zgierski                | 1.432 |
|    |            | 112. brzeziński              | 1.229 |
| 6. | Małopolska | 113. c. Łódź                 | 1.025 |
|    |            | 114. c. Piotrków Trybunalski | 0.949 |
|    |            | 115. c. Skierniewice         | 0.888 |
|    |            | 116. bocheński               | 1.268 |
|    |            | 117. brzeski                 | 1.065 |

|    |         |                   |       |
|----|---------|-------------------|-------|
|    |         | 118. chrzanowski  | 0.829 |
|    |         | 119. dąbrowski    | 0.744 |
|    |         | 120. gorlicki     | 0.763 |
|    |         | 121. krakowski    | 1.124 |
|    |         | 122. limanowski   | 1.020 |
|    |         | 123. miechowski   | 1.167 |
|    |         | 124. myślenicki   | 1.869 |
|    |         | 125. nowosądecki  | 1.146 |
|    |         | 126. nowotarski   | 1.005 |
|    |         | 127. olkusi       | 0.856 |
|    |         | 128. oświęcimski  | 0.809 |
|    |         | 129. proszowicki  | 0.932 |
|    |         | 130. suski        | 1.230 |
|    |         | 131. tarnowski    | 1.102 |
|    |         | 132. tatrzański   | 0.867 |
|    |         | 133. wadowicki    | 1.032 |
|    |         | 134. wielicki     | 1.075 |
|    |         | 135. c. Kraków    | 1.286 |
|    |         | 136. c. Nowy Sącz | 0.745 |
|    |         | 137. c. Tarnów    | 1.132 |
| 7. | Mazovia | 138. białobrzski  | 0.971 |
|    |         | 139. ciechanowski | 0.665 |
|    |         | 140. garwoliński  | 1.519 |
|    |         | 141. gostyniński  | 1.012 |
|    |         | 142. grodziski    | 1.227 |
|    |         | 143. grójecki     | 0.748 |
|    |         | 144. kozienicki   | 1.072 |
|    |         | 145. legionowski  | 1.312 |
|    |         | 146. lipski       | 1.192 |
|    |         | 147. łosicki      | 1.119 |

|  |  |                          |       |
|--|--|--------------------------|-------|
|  |  | 148. makowski            | 0.984 |
|  |  | 149. miński              | 1.156 |
|  |  | 150. mławski             | 0.537 |
|  |  | 151. nowodworski         | 1.002 |
|  |  | 152. ostrołęcki          | 0.617 |
|  |  | 153. ostrowski           | 0.796 |
|  |  | 154. otwocki             | 1.212 |
|  |  | 155. piaseczyński        | 1.155 |
|  |  | 156. plocki              | 0.984 |
|  |  | 157. płoński             | 0.540 |
|  |  | 158. pruszkowski         | 1.010 |
|  |  | 159. przasnyski          | 0.732 |
|  |  | 160. przysuski           | 0.814 |
|  |  | 161. pułtowski           | 0.731 |
|  |  | 162. radomski            | 1.236 |
|  |  | 163. siedlecki           | 1.541 |
|  |  | 164. sierpecki           | 0.543 |
|  |  | 165. sochaczewski        | 1.330 |
|  |  | 166. sokołowski          | 1.288 |
|  |  | 167. szydłowiecki        | 0.731 |
|  |  | 168. warszawski zachodni | 1.186 |
|  |  | 169. węgrowski           | 1.304 |
|  |  | 170. wołomiński          | 1.184 |
|  |  | 171. wyszkowski          | 1.465 |
|  |  | 172. zwoleński           | 1.349 |
|  |  | 173. żuromiński          | 0.370 |
|  |  | 174. żyrardowski         | 0.718 |
|  |  | 175. c. Ostrołęka        | 0.836 |
|  |  | 176. c. Płock            | 0.692 |
|  |  | 177. c. Radom            | 0.971 |

|    |             |                              |       |
|----|-------------|------------------------------|-------|
|    |             | 178. c. Siedlce              | 0.864 |
|    |             | 179. c. Warszawa             | 0.767 |
| 8. | Opole       | 180. brzeski                 | 1.017 |
|    |             | 181. głubczycki              | 1.299 |
|    |             | 182. kędzierzyńsko-kozielski | 1.183 |
|    |             | 183. kluczborski             | 0.951 |
|    |             | 184. krapkowicki             | 1.507 |
|    |             | 185. namysłowski             | 0.668 |
|    |             | 186. nyski                   | 0.746 |
|    |             | 187. oleski                  | 1.147 |
|    |             | 188. opolski                 | 1.255 |
|    |             | 189. prudnicki               | 1.050 |
|    |             | 190. strzelecki              | 1.346 |
|    |             | 191. c. Opole                | 1.248 |
| 9. | Podkarpacie | 192. bieszczadzki            | 0.861 |
|    |             | 193. brzozowski              | 1.462 |
|    |             | 194. dębicki                 | 1.066 |
|    |             | 195. jarosławski             | 0.734 |
|    |             | 196. jasielski               | 0.981 |
|    |             | 197. kolbuszowski            | 0.930 |
|    |             | 198. krośnieński             | 1.364 |
|    |             | 199. leżajski                | 1.189 |
|    |             | 200. lubaczowski             | 1.159 |
|    |             | 201. łańcucki                | 0.931 |
|    |             | 202. mielecki                | 0.588 |
|    |             | 203. niżański                | 1.308 |
|    |             | 204. przemyski               | 0.518 |
|    |             | 205. przeworski              | 0.805 |
|    |             | 206. ropczycko-sędziszowski  | 0.773 |

|     |           |                       |       |
|-----|-----------|-----------------------|-------|
|     |           | 207. rzeszowski       | 1.093 |
|     |           | 208. sanocki          | 1.017 |
|     |           | 209. stalowowolski    | 0.947 |
|     |           | 210. strzyżowski      | 1.621 |
|     |           | 211. tarnobrzeki      | 0.623 |
|     |           | 212. leski            | 0.781 |
|     |           | 213. c. Krosno        | 0.979 |
|     |           | 214. c. Przemyśl      | 0.296 |
|     |           | 215. c. Rzeszów       | 1.133 |
|     |           | 216. c. Tarnobrzeg    | 0.507 |
| 10. | Podlasie  | 217. augustowski      | 0.674 |
|     |           | 218. białostocki      | 0.889 |
|     |           | 219. bielski          | 1.207 |
|     |           | 220. grajewski        | 0.603 |
|     |           | 221. hajnowski        | 1.107 |
|     |           | 222. kolneński        | 0.488 |
|     |           | 223. łomżyński        | 0.614 |
|     |           | 224. moniecki         | 0.933 |
|     |           | 225. sejneński        | 0.926 |
|     |           | 226. siemiatycki      | 1.037 |
|     |           | 227. sokólski         | 0.626 |
|     |           | 228. suwalski         | 0.598 |
|     |           | 229. wysokomazowiecki | 0.632 |
|     |           | 230. zambrowski       | 0.700 |
|     |           | 231. c. Białystok     | 1.412 |
| 11. | Pomerania | 232. c. Łomża         | 0.526 |
|     |           | 233. c. Suwałki       | 0.458 |
|     |           | 234. bytowski         | 0.946 |
|     |           | 235. chojnicki        | 0.927 |

|     |         |                    |       |
|-----|---------|--------------------|-------|
|     |         | 236. człuchowski   | 1.021 |
|     |         | 237. gdański       | 1.056 |
|     |         | 238. kartuski      | 0.859 |
|     |         | 239. kościerski    | 1.206 |
|     |         | 240. kwidzyński    | 1.164 |
|     |         | 241. lęborski      | 0.987 |
|     |         | 242. malborski     | 0.761 |
|     |         | 243. nowodworski   | 0.673 |
|     |         | 244. pucki         | 1.373 |
|     |         | 245. słupski       | 1.075 |
|     |         | 246. starogardzki  | 1.119 |
|     |         | 247. tczewski      | 0.656 |
|     |         | 248. wejherowski   | 1.052 |
|     |         | 249. sztumski      | 0.771 |
|     |         | 250. c. Gdańsk     | 1.113 |
|     |         | 251. c. Gdynia     | 0.885 |
|     |         | 252. c. Słupsk     | 0.613 |
|     |         | 253. c. Sopot      | 1.018 |
| 12. | Silesia | 254. będziński     | 0.935 |
|     |         | 255. bielski       | 2.161 |
|     |         | 256. cieszyński    | 1.771 |
|     |         | 257. częstochowski | 1.334 |
|     |         | 258. gliwicki      | 1.210 |
|     |         | 259. kłobucki      | 1.042 |
|     |         | 260. lubliniecki   | 1.022 |
|     |         | 261. mikołowski    | 1.266 |
|     |         | 262. myszkowski    | 1.232 |
|     |         | 263. pszczyński    | 1.411 |
|     |         | 264. raciborski    | 1.422 |
|     |         | 265. rybnicki      | 1.731 |

|     |                |                              |       |
|-----|----------------|------------------------------|-------|
|     |                | 266. tarnogórski             | 1.324 |
|     |                | 267. bieruńsko-lędziński     | 1.766 |
|     |                | 268. wodzisławski            | 1.468 |
|     |                | 269. zawierciański           | 0.859 |
|     |                | 270. żywiecki                | 1.789 |
|     |                | 271. c. Bielsko-Biała        | 2.894 |
|     |                | 272. c. Bytom                | 1.021 |
|     |                | 273. c. Chorzów              | 1.049 |
|     |                | 274. c. Częstochowa          | 0.896 |
|     |                | 275. c. Dąbrowa Górnicza     | 0.938 |
|     |                | 276. c. Gliwice              | 1.018 |
|     |                | 277. c. Jastrzębie-Zdrój     | 0.993 |
|     |                | 278. c. Jaworzno             | 0.931 |
|     |                | 279. c. Katowice             | 0.820 |
|     |                | 280. c. Mysłowice            | 3.077 |
|     |                | 281. c. Piekary Śląskie      | 0.752 |
|     |                | 282. c. Ruda Śląska          | 0.719 |
|     |                | 283. c. Rybnik               | 1.220 |
|     |                | 284. c. Siemianowice Śląskie | 0.769 |
|     |                | 285. c. Sosnowiec            | 3.264 |
|     |                | 286. c. Świętochłowice       | 1.422 |
|     |                | 287. c. Tychy                | 0.950 |
|     |                | 288. c. Zabrze               | 1.181 |
|     |                | 289. c. Żory                 | 0.940 |
| 13. | Świętokrzyskie | 290. buski                   | 1.103 |
|     |                | 291. jędrzejowski            | 1.228 |
|     |                | 292. kazimierski             | 1.102 |
|     |                | 293. kielecki                | 1.668 |
|     |                | 294. konecki                 | 0.737 |
|     |                | 295. opatowski               | 0.837 |

|     |                   |                    |       |
|-----|-------------------|--------------------|-------|
|     |                   | 296. ostrowiecki   | 1.024 |
|     |                   | 297. pińczowski    | 0.727 |
|     |                   | 298. sandomierski  | 0.835 |
|     |                   | 299. skarżyski     | 1.322 |
|     |                   | 300. starachowicki | 0.598 |
|     |                   | 301. staszowski    | 0.717 |
|     |                   | 302. włoszczowski  | 1.191 |
|     |                   | 303. c. Kielce     | 0.840 |
| 14. | Warmia and Mazury | 304. bartoszycki   | 0.698 |
|     |                   | 305. braniewski    | 0.720 |
|     |                   | 306. działdowski   | 1.878 |
|     |                   | 307. elbląski      | 0.876 |
|     |                   | 308. ełcki         | 0.283 |
|     |                   | 309. giżycki       | 0.643 |
|     |                   | 310. iławski       | 0.513 |
|     |                   | 311. kętrzyński    | 1.371 |
|     |                   | 312. lidzbarski    | 0.380 |
|     |                   | 313. mrągowski     | 0.627 |
|     |                   | 314. nidzicki      | 1.403 |
|     |                   | 315. nowomiejski   | 0.592 |
|     |                   | 316. olecki        | 0.229 |
|     |                   | 317. olsztyński    | 0.588 |
|     |                   | 318. ostródzki     | 0.303 |
|     |                   | 319. piski         | 0.336 |
|     |                   | 320. szczycieński  | 0.912 |
|     |                   | 321. gołdapski     | 0.259 |
|     |                   | 322. węgorzewski   | 0.558 |
|     |                   | 323. c. Elbląg     | 0.643 |
|     |                   | 324. c. Olsztyn    | 0.705 |

|     |              |                              |       |
|-----|--------------|------------------------------|-------|
| 15. | Wielkopolska | 325. chodzieski              | 0.842 |
|     |              | 326. czarnkowsko-trzcianecki | 0.599 |
|     |              | 327. gnieźnieński            | 0.705 |
|     |              | 328. gostyński               | 0.708 |
|     |              | 329. grodziski               | 0.460 |
|     |              | 330. jarociński              | 0.736 |
|     |              | 331. kaliski                 | 1.294 |
|     |              | 332. kępiński                | 1.125 |
|     |              | 333. kolski                  | 1.179 |
|     |              | 334. koniński                | 1.298 |
|     |              | 335. kościański              | 0.391 |
|     |              | 336. krotoszyński            | 0.782 |
|     |              | 337. leszczyński             | 0.607 |
|     |              | 338. międzychodzki           | 0.685 |
|     |              | 339. nowotomyski             | 0.692 |
|     |              | 340. obornicki               | 0.971 |
|     |              | 341. ostrowski               | 0.582 |
|     |              | 342. ostrzeszowski           | 1.521 |
|     |              | 343. pilski                  | 0.672 |
|     |              | 344. pleszewski              | 0.835 |
|     |              | 345. poznański               | 1.033 |
|     |              | 346. rawicki                 | 0.617 |
|     |              | 347. słupecki                | 1.589 |
|     |              | 348. szamotulski             | 0.867 |
|     |              | 349. średzki                 | 0.629 |
|     |              | 350. śremski                 | 0.711 |
|     |              | 351. turecki                 | 1.070 |
|     |              | 352. wągrowiecki             | 0.843 |
|     |              | 353. wolsztyński             | 0.777 |
|     |              | 354. wrzesiński              | 0.643 |

|     |                |                     |       |
|-----|----------------|---------------------|-------|
|     |                | 355. złotowski      | 0.852 |
|     |                | 356. c. Kalisz      | 1.139 |
|     |                | 357. c. Konin       | 1.055 |
|     |                | 358. c. Leszno      | 0.788 |
|     |                | 359. c. Poznań      | 1.037 |
| 16. | West Pomerania | 360. białogardzki   | 0.865 |
|     |                | 361. choszczeński   | 0.587 |
|     |                | 362. drawski        | 0.946 |
|     |                | 363. goleniowski    | 0.533 |
|     |                | 364. gryficki       | 0.923 |
|     |                | 365. gryfiński      | 0.642 |
|     |                | 366. kamieński      | 0.800 |
|     |                | 367. kołobrzeski    | 1.157 |
|     |                | 368. koszaliński    | 0.846 |
|     |                | 369. myśliborski    | 0.775 |
|     |                | 370. policki        | 0.860 |
|     |                | 371. pyrzycki       | 0.629 |
|     |                | 372. sławieński     | 0.654 |
|     |                | 373. stargardzki    | 0.731 |
|     |                | 374. szczecinecki   | 0.913 |
|     |                | 375. świdwiński     | 1.082 |
|     |                | 376. wałecki        | 0.728 |
|     |                | 377. łobeski        | 1.141 |
|     |                | 378. c. Koszalin    | 0.852 |
|     |                | 379. c. Szczecin    | 0.707 |
|     |                | 380. c. Świnoujście | 0.946 |

Source: own elaboration
