# Supplementary material for: The Evaluation of Municipal Waste in Counties in Poland with the Use of the Theory of Phenomena Spatial Concentration
Source: MDPI journal article supplement (doi:10.3390/ijerph17239107), 2020-12-06
Supplement: s1 [file s1]

**Table S2.** The values of the location quotients ( $LQ$ ) for the analyzed fractions of selected waste in comparison with all selected waste in counties in Poland

| No.<br>voivodeship | Voivodeship   | Counties          | Location quotient ( $LQ$ )         |                  |                    |                                                                  |                         |                                   |
|--------------------|---------------|-------------------|------------------------------------|------------------|--------------------|------------------------------------------------------------------|-------------------------|-----------------------------------|
|                    |               |                   | Paper and<br>cardboard<br>( $PC$ ) | Glass<br>( $G$ ) | Plastic<br>( $P$ ) | Waste<br>electrical and<br>electronic<br>equipment<br>( $WEEE$ ) | Bulky waste<br>( $BW$ ) | Biodegradable<br>waste<br>( $B$ ) |
| 1.                 | Lower Silesia | 1. bolesławiecki  | 0.745                              | 1.167            | 0.441              | 1.071                                                            | 0.882                   | 1.566                             |
|                    |               | 2. dzierżoniowski | 1.720                              | 1.388            | 0.996              | 0.629                                                            | 2.253                   | 0.555                             |
|                    |               | 3. głogowski      | 1.396                              | 0.956            | 0.796              | 0.541                                                            | 1.494                   | 1.048                             |
|                    |               | 4. górowski       | 1.497                              | 1.895            | 3.909              | 0.198                                                            | 0.932                   | 0.412                             |
|                    |               | 5. jaworski       | 1.573                              | 1.667            | 0.029              | 1.135                                                            | 0.657                   | 0.793                             |
|                    |               | 6. jeleniogórski  | 1.120                              | 1.124            | 2.106              | 0.293                                                            | 1.161                   | 1.332                             |
|                    |               | 7. kamiennogórski | 1.956                              | 1.406            | 0.901              | 1.347                                                            | 1.331                   | 0.486                             |
|                    |               | 8. kłodzki        | 1.040                              | 1.266            | 0.532              | 1.130                                                            | 1.450                   | 0.950                             |
|                    |               | 9. legnicki       | 0.399                              | 0.777            | 0.652              | 0.364                                                            | 0.567                   | 1.385                             |
|                    |               | 10. lubański      | 0.580                              | 1.115            | 0.657              | 0.112                                                            | 1.742                   | 1.585                             |
|                    |               | 11. lubiński      | 1.337                              | 1.025            | 1.002              | 3.137                                                            | 1.255                   | 1.048                             |
|                    |               | 12. lwówecki      | 0.823                              | 1.753            | 0.848              | 0.272                                                            | 0.955                   | 0.771                             |
|                    |               | 13. milicki       | 0.650                              | 1.958            | 2.393              | 0.128                                                            | 0.461                   | 1.028                             |
|                    |               | 14. oleśnicki     | 1.165                              | 1.344            | 1.362              | 1.085                                                            | 1.334                   | 1.139                             |
|                    |               | 15. oławski       | 1.124                              | 1.694            | 0.212              | 1.816                                                            | 1.302                   | 1.215                             |
|                    |               | 16. polkowicki    | 1.902                              | 1.459            | 0.026              | 1.277                                                            | 1.307                   | 0.495                             |
|                    |               | 17. strzeliński   | 0.889                              | 2.047            | 0.003              | 0.671                                                            | 0.485                   | 1.281                             |
|                    |               | 18. średzki       | 1.812                              | 1.877            | 0.534              | 0.481                                                            | 1.087                   | 0.429                             |
|                    |               | 19. świdnicki     | 2.055                              | 1.416            | 1.873              | 0.826                                                            | 1.141                   | 0.616                             |
|                    |               | 20. trzebnicki    | 1.007                              | 1.072            | 2.096              | 0.337                                                            | 0.990                   | 1.498                             |
|                    |               | 21. wałbrzyski    | 1.593                              | 1.369            | 2.282              | 0.546                                                            | 1.109                   | 0.520                             |
|                    |               | 22. wołowski      | 1.058                              | 1.203            | 1.289              | 0.185                                                            | 1.906                   | 1.146                             |

|    |                      |                         |       |       |       |       |       |       |
|----|----------------------|-------------------------|-------|-------|-------|-------|-------|-------|
|    |                      | 23. wrocławski          | 1.084 | 1.189 | 1.494 | 0.520 | 0.693 | 1.354 |
|    |                      | 24. ząbkowicki          | 0.346 | 0.877 | 0.388 | 0.539 | 2.838 | 0.983 |
|    |                      | 25. zgorzelecki         | 1.075 | 1.004 | 0.509 | 0.432 | 1.830 | 1.455 |
|    |                      | 26. złotoryjski         | 3.600 | 1.403 | 1.053 | 0.030 | 0.671 | 0.359 |
|    |                      | 27. c. Jelenia Góra     | 2.191 | 1.675 | 0.103 | 1.072 | 0.930 | 0.286 |
|    |                      | 28. c. Legnica          | 0.786 | 0.999 | 0.671 | 0.128 | 0.960 | 0.810 |
|    |                      | 29. c. Wrocław          | 2.822 | 1.032 | 0.039 | 0.646 | 1.047 | 0.799 |
|    |                      | 30. c. Wałbrzych        | 1.886 | 0.084 | 0.609 | 8.687 | 3.411 | 0.606 |
| 2. | Kujawy and Pomerania | 31. aleksandrowski      | 0.468 | 0.719 | 1.181 | 0.402 | 0.422 | 1.367 |
|    |                      | 32. brodnicki           | 0.518 | 0.970 | 2.334 | 0.391 | 0.673 | 1.477 |
|    |                      | 33. bydgoski            | 0.672 | 1.070 | 0.770 | 0.335 | 0.554 | 1.584 |
|    |                      | 34. chełmiński          | 0.513 | 1.503 | 0.126 | 1.529 | 0.864 | 1.227 |
|    |                      | 35. golubsko-dobrzyński | 0.932 | 1.791 | 2.690 | 1.047 | 0.446 | 1.069 |
|    |                      | 36. grudziądzki         | 0.631 | 1.645 | 3.607 | 0.824 | 0.158 | 1.269 |
|    |                      | 37. inowrocławski       | 0.699 | 1.004 | 1.445 | 0.180 | 0.501 | 2.034 |
|    |                      | 38. lipnowski           | 0.012 | 0.572 | 2.007 | 1.202 | 0.602 | 0.927 |
|    |                      | 39. mogileński          | 0.586 | 1.056 | 1.576 | 0.517 | 0.618 | 1.209 |
|    |                      | 40. nakielski           | 1.655 | 1.808 | 2.428 | 1.550 | 0.935 | 0.644 |
|    |                      | 41. radziejowski        | 0.296 | 1.017 | 0.924 | 0.592 | 0.453 | 0.457 |
|    |                      | 42. rypiński            | 1.933 | 1.419 | 2.041 | 1.464 | 0.382 | 1.013 |
|    |                      | 43. sępoleński          | 0.152 | 1.448 | 0.819 | 0.950 | 0.583 | 0.925 |
|    |                      | 44. świecki             | 0.565 | 1.272 | 2.711 | 4.073 | 0.580 | 1.281 |
|    |                      | 45. toruński            | 0.237 | 0.919 | 1.049 | 0.679 | 0.353 | 1.815 |
|    |                      | 46. tucholski           | 0.491 | 1.239 | 1.999 | 1.504 | 0.597 | 0.804 |
|    |                      | 47. wąbrzeski           | 0.741 | 1.140 | 1.880 | 1.262 | 0.842 | 1.475 |
|    |                      | 48. włocławski          | 0.335 | 0.621 | 0.671 | 0.278 | 0.168 | 1.016 |
|    |                      | 49. żniński             | 1.219 | 1.794 | 3.507 | 1.228 | 0.732 | 0.770 |
|    |                      | 50. c. Bydgoszcz        | 0.229 | 1.245 | 0.102 | 1.111 | 1.129 | 1.246 |
|    |                      | 51. c. Grudziądz        | 1.696 | 1.004 | 2.301 | 0.059 | 0.005 | 1.847 |
|    |                      | 52. c. Toruń            | 1.734 | 1.130 | 1.637 | 0.499 | 1.030 | 1.392 |

|    |          |                       |       |       |       |       |       |       |
|----|----------|-----------------------|-------|-------|-------|-------|-------|-------|
|    |          | 53. c. Włocławek      | 0.599 | 0.646 | 0.844 | 0.801 | 0.573 | 2.333 |
| 3. | Lublin   | 54. bialski           | 1.293 | 1.396 | 0.829 | 0.760 | 0.297 | 0.513 |
|    |          | 55. biłgorajski       | 1.621 | 1.937 | 1.773 | 2.906 | 0.746 | 0.523 |
|    |          | 56. chełmski          | 0.335 | 2.045 | 0.791 | 1.724 | 0.450 | 0.211 |
|    |          | 57. hrubieszowski     | 0.617 | 2.074 | 0.811 | 2.753 | 0.991 | 0.360 |
|    |          | 58. janowski          | 0.849 | 1.590 | 0.614 | 1.482 | 1.748 | 0.694 |
|    |          | 59. krasnostawski     | 0.970 | 2.415 | 3.063 | 2.346 | 0.680 | 0.591 |
|    |          | 60. kraśnicki         | 0.648 | 1.040 | 0.110 | 0.617 | 0.982 | 1.229 |
|    |          | 61. lubartowski       | 0.580 | 1.385 | 1.876 | 2.036 | 0.643 | 1.145 |
|    |          | 62. lubelski          | 0.916 | 1.447 | 2.009 | 2.496 | 1.067 | 0.684 |
|    |          | 63. łączyński         | 0.821 | 1.083 | 0.543 | 0.767 | 0.607 | 0.398 |
|    |          | 64. łukowski          | 0.729 | 0.971 | 0.465 | 0.534 | 0.396 | 1.129 |
|    |          | 65. opolski           | 1.095 | 1.602 | 2.441 | 2.436 | 0.825 | 0.365 |
|    |          | 66. parczewski        | 0.376 | 1.374 | 0.109 | 1.579 | 0.411 | 1.133 |
|    |          | 67. puławski          | 1.153 | 1.097 | 1.344 | 1.208 | 0.654 | 1.191 |
|    |          | 68. radzyński         | 0.311 | 0.744 | 0.705 | 0.968 | 0.260 | 1.323 |
|    |          | 69. rycki             | 1.398 | 1.826 | 0.546 | 1.318 | 0.447 | 0.751 |
|    |          | 70. świdnicki         | 1.269 | 1.217 | 2.018 | 1.130 | 1.055 | 0.923 |
|    |          | 71. tomaszowski       | 0.225 | 0.827 | 0.750 | 2.559 | 0.771 | 0.921 |
|    |          | 72. włodawski         | 0.185 | 0.401 | 0.021 | 1.419 | 0.719 | 0.183 |
|    |          | 73. zamojski          | 1.039 | 1.993 | 1.971 | 3.092 | 0.605 | 0.305 |
|    |          | 74. c. Biała Podlaska | 2.211 | 1.070 | 0.344 | 0.787 | 0.314 | 0.122 |
|    |          | 75. c. Chełm          | 0.689 | 0.788 | 0.251 | 0.955 | 0.231 | 1.097 |
|    |          | 76. c. Lublin         | 1.004 | 0.727 | 0.539 | 0.414 | 0.949 | 1.212 |
|    |          | 77. c. Zamość         | 1.959 | 0.962 | 1.834 | 1.704 | 0.745 | 0.900 |
| 4. | Lubuskie | 78. gorzowski         | 0.825 | 0.856 | 1.002 | 0.078 | 1.732 | 1.400 |
|    |          | 79. krośniński        | 0.800 | 1.211 | 2.788 | 0.950 | 1.833 | 0.842 |
|    |          | 80. międzyrzecki      | 1.716 | 1.127 | 2.350 | 0.383 | 1.278 | 1.052 |
|    |          | 81. nowosolski        | 0.825 | 0.794 | 1.542 | 0.037 | 1.015 | 1.867 |

|    |      |                            |       |       |       |       |       |       |
|----|------|----------------------------|-------|-------|-------|-------|-------|-------|
|    |      | 82. słubicki               | 1.074 | 0.651 | 1.614 | 0.880 | 1.821 | 1.430 |
|    |      | 83. strzelecko-drezdenecki | 0.888 | 0.862 | 1.573 | 0.088 | 2.146 | 0.941 |
|    |      | 84. sulęciński             | 1.725 | 0.872 | 1.267 | 0.228 | 2.027 | 1.188 |
|    |      | 85. świebodziński          | 1.551 | 0.969 | 2.750 | 0.030 | 1.090 | 0.691 |
|    |      | 86. zielonogórski          | 0.858 | 0.819 | 2.076 | 0.310 | 1.852 | 1.038 |
|    |      | 87. żagański               | 1.583 | 1.500 | 1.559 | 1.107 | 1.813 | 0.822 |
|    |      | 88. żarski                 | 1.198 | 0.961 | 1.417 | 0.123 | 1.544 | 1.273 |
|    |      | 89. wschowski              | 0.168 | 1.241 | 3.214 | 1.071 | 1.063 | 1.255 |
|    |      | 90. c. Gorzów Wielkopolski | 1.268 | 0.498 | 1.102 | 0.573 | 1.457 | 1.783 |
|    |      | 91. c. Zielona Góra        | 2.653 | 0.952 | 1.959 | 0.568 | 1.254 | 0.832 |
| 5. | Łódź | 92. bełchatowski           | 0.743 | 1.193 | 0.534 | 0.126 | 1.120 | 1.090 |
|    |      | 93. kutnowski              | 0.070 | 0.722 | 0.424 | 0.332 | 0.270 | 1.772 |
|    |      | 94. łaski                  | 0.107 | 1.121 | 0.209 | 0.268 | 0.893 | 1.084 |
|    |      | 95. łączycki               | 0.191 | 1.395 | 0.899 | 1.021 | 0.978 | 0.268 |
|    |      | 96. łowicki                | 0.295 | 1.643 | 0.114 | 1.945 | 0.836 | 0.847 |
|    |      | 97. łódzki wschodni        | 2.222 | 1.743 | 1.348 | 0.532 | 0.553 | 0.878 |
|    |      | 98. opoczyński             | 3.099 | 2.277 | 2.031 | 0.860 | 0.798 | 0.097 |
|    |      | 99. pabianicki             | 0.117 | 0.806 | 0.164 | 0.358 | 2.115 | 1.156 |
|    |      | 100. pajęczański           | 0.380 | 2.076 | 1.208 | 0.562 | 1.143 | 0.272 |
|    |      | 101. piotrkowski           | 1.071 | 1.522 | 1.264 | 0.334 | 0.831 | 0.702 |
|    |      | 102. poddębicki            | 0.421 | 1.264 | 0.634 | 0.746 | 1.096 | 1.035 |
|    |      | 103. radomszczański        | 0.716 | 1.012 | 1.442 | 0.722 | 0.801 | 1.098 |
|    |      | 104. rawski                | 3.155 | 1.434 | 2.537 | 1.189 | 0.967 | 0.485 |
|    |      | 105. sieradzki             | 1.235 | 1.460 | 0.875 | 1.683 | 0.904 | 0.630 |
|    |      | 106. skierniewicki         | 0.082 | 1.923 | 0.379 | 0.091 | 1.515 | 0.153 |
|    |      | 107. tomaszowski           | 1.854 | 1.476 | 1.967 | 0.492 | 1.369 | 0.726 |
|    |      | 108. wieluński             | 0.325 | 1.861 | 0.019 | 0.100 | 1.459 | 0.436 |
|    |      | 109. wieruszowski          | 0.000 | 1.759 | 0.001 | 0.003 | 1.873 | 0.356 |
|    |      | 110. zduńskowolski         | 1.361 | 1.006 | 0.959 | 0.039 | 0.057 | 0.012 |
|    |      | 111. zgierski              | 0.591 | 0.801 | 0.905 | 1.012 | 0.733 | 0.747 |

|    |            |                              |       |       |       |       |       |       |
|----|------------|------------------------------|-------|-------|-------|-------|-------|-------|
|    |            | 112. brzeziński              | 0.374 | 0.573 | 0.680 | 0.048 | 2.667 | 0.640 |
|    |            | 113. c. Łódź                 | 0.129 | 0.171 | 0.398 | 1.088 | 0.806 | 1.886 |
|    |            | 114. c. Piotrków Trybunalski | 3.004 | 2.080 | 2.166 | 0.849 | 0.322 | 0.742 |
|    |            | 115. c. Skierniewice         | 0.635 | 0.967 | 0.015 | 0.239 | 0.467 | 1.771 |
| 6. | Małopolska | 116. bocheński               | 1.195 | 1.632 | 2.430 | 0.915 | 1.058 | 0.911 |
|    |            | 117. brzeski                 | 0.870 | 1.719 | 2.704 | 1.828 | 1.654 | 0.064 |
|    |            | 118. chrzanowski             | 0.984 | 1.320 | 2.088 | 0.703 | 1.197 | 1.185 |
|    |            | 119. dąbrowski               | 1.124 | 1.973 | 4.041 | 1.763 | 1.121 | 0.189 |
|    |            | 120. gorlicki                | 1.377 | 1.309 | 3.035 | 0.368 | 1.679 | 0.344 |
|    |            | 121. krakowski               | 1.667 | 0.990 | 1.919 | 1.130 | 1.631 | 0.578 |
|    |            | 122. limanowski              | 0.417 | 1.257 | 3.010 | 1.046 | 1.804 | 0.358 |
|    |            | 123. miechowski              | 1.000 | 1.877 | 2.844 | 2.101 | 0.581 | 0.258 |
|    |            | 124. myślenicki              | 0.436 | 0.924 | 0.872 | 0.411 | 1.281 | 1.108 |
|    |            | 125. nowosądecki             | 0.893 | 1.723 | 2.887 | 0.805 | 1.725 | 0.436 |
|    |            | 126. nowotarski              | 0.298 | 0.952 | 1.800 | 0.411 | 1.613 | 0.558 |
|    |            | 127. olkuski                 | 0.976 | 1.310 | 0.810 | 3.316 | 1.089 | 0.958 |
|    |            | 128. oświęcimski             | 0.806 | 1.353 | 1.001 | 1.251 | 1.404 | 1.088 |
|    |            | 129. proszowicki             | 0.998 | 2.923 | 1.576 | 3.616 | 0.892 | 0.135 |
|    |            | 130. suski                   | 0.464 | 1.432 | 3.474 | 0.941 | 1.771 | 0.263 |
|    |            | 131. tarnowski               | 1.004 | 1.589 | 2.653 | 0.988 | 1.505 | 0.519 |
|    |            | 132. tatrzański              | 0.892 | 1.250 | 0.754 | 0.830 | 1.755 | 0.507 |
|    |            | 133. wadowicki               | 0.625 | 1.631 | 2.806 | 0.557 | 1.539 | 0.580 |
|    |            | 134. wielicki                | 0.855 | 0.981 | 1.240 | 0.388 | 1.461 | 0.705 |
|    |            | 135. c. Kraków               | 0.178 | 0.548 | 0.120 | 0.716 | 0.802 | 1.293 |
|    |            | 136. c. Nowy Sącz            | 1.740 | 1.147 | 2.289 | 0.237 | 1.974 | 0.741 |
|    |            | 137. c. Tarnów               | 1.028 | 0.391 | 1.906 | 0.046 | 1.782 | 1.454 |
| 7. | Mazovia    | 138. białobrzesci            | 1.509 | 1.111 | 1.205 | 0.415 | 0.736 | 0.076 |
|    |            | 139. ciechanowski            | 0.951 | 1.080 | 1.171 | 0.942 | 0.599 | 1.570 |
|    |            | 140. garwoliński             | 4.416 | 1.310 | 1.760 | 2.601 | 0.559 | 0.516 |

|  |  |                          |       |       |       |        |       |       |
|--|--|--------------------------|-------|-------|-------|--------|-------|-------|
|  |  | 141. gostyniński         | 0.040 | 1.130 | 1.059 | 0.912  | 0.698 | 0.786 |
|  |  | 142. grodziski           | 1.081 | 0.698 | 0.514 | 0.433  | 0.856 | 1.068 |
|  |  | 143. grójecki            | 4.572 | 0.822 | 0.877 | 18.059 | 0.529 | 0.281 |
|  |  | 144. kozienicki          | 1.436 | 1.536 | 1.128 | 0.416  | 0.898 | 1.006 |
|  |  | 145. legionowski         | 0.544 | 0.615 | 0.220 | 3.531  | 1.027 | 0.965 |
|  |  | 146. lipski              | 0.828 | 2.265 | 0.510 | 0.992  | 0.867 | 0.116 |
|  |  | 147. łosicki             | 0.624 | 1.979 | 1.679 | 1.604  | 0.391 | 0.742 |
|  |  | 148. makowski            | 0.899 | 1.217 | 1.073 | 0.686  | 0.573 | 0.579 |
|  |  | 149. miński              | 1.425 | 1.331 | 1.846 | 0.859  | 0.688 | 0.484 |
|  |  | 150. mławski             | 0.080 | 0.125 | 0.140 | 0.590  | 1.899 | 0.576 |
|  |  | 151. nowodworski         | 1.421 | 0.936 | 1.044 | 1.567  | 0.905 | 0.326 |
|  |  | 152. ostrołęcki          | 2.844 | 1.141 | 2.366 | 4.698  | 0.885 | 0.331 |
|  |  | 153. ostrowski           | 2.084 | 1.171 | 1.530 | 2.783  | 0.457 | 0.934 |
|  |  | 154. otwocki             | 2.571 | 0.764 | 1.061 | 0.624  | 0.592 | 1.474 |
|  |  | 155. piaseczyński        | 0.948 | 0.773 | 0.396 | 0.609  | 0.753 | 1.161 |
|  |  | 156. płocki              | 0.342 | 1.365 | 0.679 | 1.304  | 0.833 | 0.658 |
|  |  | 157. płoński             | 1.663 | 1.358 | 2.229 | 1.916  | 1.552 | 0.568 |
|  |  | 158. pruszkowski         | 2.468 | 0.822 | 1.271 | 0.464  | 1.056 | 0.856 |
|  |  | 159. przasnyski          | 2.116 | 0.730 | 0.926 | 4.271  | 0.500 | 0.667 |
|  |  | 160. przysuski           | 1.079 | 2.588 | 3.517 | 1.956  | 0.681 | 0.000 |
|  |  | 161. pułtowski           | 1.957 | 1.196 | 1.877 | 0.392  | 0.105 | 0.138 |
|  |  | 162. radomski            | 1.036 | 1.409 | 1.379 | 0.475  | 0.844 | 0.587 |
|  |  | 163. siedlecki           | 0.246 | 1.496 | 3.102 | 0.982  | 0.453 | 0.547 |
|  |  | 164. sierpecki           | 0.779 | 1.689 | 1.641 | 0.701  | 0.357 | 1.466 |
|  |  | 165. sochaczewski        | 0.774 | 1.369 | 0.632 | 0.068  | 1.252 | 0.673 |
|  |  | 166. sokołowski          | 1.611 | 1.722 | 2.531 | 1.961  | 0.444 | 0.228 |
|  |  | 167. szydłowiecki        | 0.655 | 1.985 | 1.418 | 0.584  | 0.595 | 0.482 |
|  |  | 168. warszawski zachodni | 1.028 | 0.427 | 0.460 | 0.831  | 1.010 | 1.091 |
|  |  | 169. węgrowski           | 0.328 | 1.416 | 3.286 | 3.292  | 0.640 | 0.387 |
|  |  | 170. wołomiński          | 1.607 | 0.952 | 1.667 | 1.095  | 0.563 | 1.567 |

|    |             |                              |       |       |       |       |       |       |
|----|-------------|------------------------------|-------|-------|-------|-------|-------|-------|
|    |             | 171. wyszkowski              | 3.060 | 1.256 | 2.223 | 0.217 | 0.934 | 0.430 |
|    |             | 172. zwoleński               | 1.094 | 1.635 | 1.664 | 1.002 | 0.712 | 0.671 |
|    |             | 173. żuromiński              | 0.288 | 2.007 | 1.462 | 1.790 | 0.947 | 0.559 |
|    |             | 174. żyrardowski             | 0.648 | 1.418 | 0.430 | 0.402 | 0.648 | 0.221 |
|    |             | 175. c. Ostrołęka            | 2.115 | 0.573 | 1.836 | 0.598 | 0.753 | 0.930 |
|    |             | 176. c. Płock                | 0.324 | 0.654 | 0.012 | 0.493 | 1.517 | 1.074 |
|    |             | 177. c. Radom                | 0.810 | 0.637 | 0.158 | 0.001 | 0.744 | 0.831 |
|    |             | 178. c. Siedlce              | 1.623 | 0.760 | 1.851 | 0.400 | 0.611 | 1.409 |
|    |             | 179. c. Warszawa             | 0.054 | 0.593 | 0.043 | 3.190 | 1.380 | 0.719 |
| 8. | Opole       | 180. brzeski                 | 0.357 | 1.078 | 0.003 | 0.422 | 0.843 | 1.109 |
|    |             | 181. głubczycki              | 0.717 | 0.668 | 0.523 | 0.780 | 0.590 | 0.705 |
|    |             | 182. kędzierzyńsko-kozielski | 0.169 | 0.779 | 0.003 | 0.111 | 1.274 | 1.472 |
|    |             | 183. kluczborski             | 0.146 | 1.496 | 1.456 | 0.510 | 0.719 | 0.720 |
|    |             | 184. krapkowicki             | 0.083 | 0.578 | 0.000 | 0.038 | 1.171 | 1.578 |
|    |             | 185. namysłowski             | 1.330 | 2.244 | 3.057 | 0.000 | 1.310 | 0.329 |
|    |             | 186. nyski                   | 0.420 | 1.322 | 0.863 | 0.748 | 0.865 | 0.225 |
|    |             | 187. oleski                  | 0.381 | 1.513 | 0.592 | 0.168 | 1.518 | 0.869 |
|    |             | 188. opolski                 | 0.627 | 1.170 | 1.319 | 0.566 | 0.996 | 0.954 |
|    |             | 189. prudnicki               | 0.431 | 0.917 | 1.084 | 0.537 | 0.774 | 1.256 |
|    |             | 190. strzelecki              | 0.110 | 0.777 | 0.211 | 0.788 | 0.931 | 1.293 |
|    |             | 191. c. Opole                | 0.069 | 0.748 | 0.041 | 0.318 | 0.988 | 1.297 |
| 9. | Podkarpacie | 192. bieszczadzki            | 0.533 | 2.341 | 2.286 | 4.119 | 2.268 | 0.153 |
|    |             | 193. brzozowski              | 0.581 | 1.286 | 0.468 | 0.569 | 1.822 | 0.140 |
|    |             | 194. dębicki                 | 0.833 | 1.319 | 0.997 | 1.751 | 0.969 | 0.665 |
|    |             | 195. jarosławski             | 2.495 | 1.142 | 1.039 | 0.666 | 1.437 | 0.561 |
|    |             | 196. jasielski               | 1.589 | 1.107 | 0.715 | 0.365 | 1.344 | 0.648 |
|    |             | 197. kolbuszowski            | 0.733 | 2.915 | 2.501 | 1.138 | 0.847 | 0.188 |
|    |             | 198. krośnieński             | 0.429 | 1.522 | 0.120 | 1.041 | 1.476 | 0.542 |
|    |             | 199. leżajski                | 0.927 | 1.600 | 0.548 | 1.732 | 0.711 | 0.820 |

|     |          |                             |       |       |       |       |       |       |
|-----|----------|-----------------------------|-------|-------|-------|-------|-------|-------|
|     |          | 200. lubaczowski            | 1.939 | 1.589 | 2.965 | 2.253 | 1.507 | 0.099 |
|     |          | 201. łańcucki               | 0.664 | 2.252 | 1.057 | 2.012 | 0.719 | 0.567 |
|     |          | 202. mielecki               | 1.213 | 1.592 | 1.449 | 0.705 | 1.430 | 0.811 |
|     |          | 203. niżański               | 0.313 | 1.475 | 2.678 | 1.118 | 0.722 | 1.025 |
|     |          | 204. przemyski              | 0.529 | 2.284 | 2.310 | 1.390 | 1.286 | 0.109 |
|     |          | 205. przeworski             | 1.634 | 1.558 | 0.581 | 1.304 | 0.973 | 0.411 |
|     |          | 206. ropczycko-sędziszowski | 0.970 | 2.474 | 2.983 | 2.062 | 0.935 | 0.047 |
|     |          | 207. rzeszowski             | 0.339 | 1.501 | 0.979 | 1.832 | 0.969 | 0.416 |
|     |          | 208. sanocki                | 1.421 | 1.395 | 0.610 | 2.603 | 1.546 | 0.813 |
|     |          | 209. stalowowolski          | 1.273 | 1.320 | 2.347 | 1.110 | 1.378 | 0.700 |
|     |          | 210. strzyżowski            | 0.410 | 1.331 | 0.782 | 0.078 | 1.342 | 0.298 |
|     |          | 211. tarnobrzeski           | 1.794 | 1.725 | 3.338 | 0.662 | 1.299 | 0.266 |
|     |          | 212. leski                  | 0.472 | 2.698 | 3.930 | 2.487 | 1.166 | 0.092 |
|     |          | 213. c. Krosno              | 0.072 | 1.271 | 0.033 | 0.284 | 1.850 | 0.877 |
|     |          | 214. c. Przemyśl            | 2.869 | 1.553 | 0.000 | 1.772 | 1.008 | 0.340 |
|     |          | 215. c. Rzeszów             | 0.298 | 0.535 | 0.161 | 0.356 | 0.522 | 0.486 |
|     |          | 216. c. Tarnobrzeg          | 1.886 | 1.288 | 3.725 | 0.960 | 1.458 | 0.348 |
| 10. | Podlasie | 217. augustowski            | 1.613 | 1.488 | 2.252 | 2.004 | 0.882 | 0.652 |
|     |          | 218. białostocki            | 0.838 | 0.717 | 0.979 | 0.741 | 1.062 | 0.998 |
|     |          | 219. bielski                | 0.374 | 0.552 | 0.256 | 1.023 | 0.505 | 1.687 |
|     |          | 220. grajewski              | 1.418 | 1.082 | 2.037 | 2.943 | 0.675 | 0.959 |
|     |          | 221. hajnowski              | 1.010 | 1.196 | 0.230 | 2.049 | 0.622 | 0.965 |
|     |          | 222. kolneński              | 0.599 | 2.240 | 4.547 | 2.907 | 0.755 | 0.253 |
|     |          | 223. łomżyński              | 0.442 | 1.877 | 3.150 | 1.440 | 1.617 | 0.158 |
|     |          | 224. moniecki               | 0.565 | 1.058 | 1.874 | 3.475 | 0.774 | 0.595 |
|     |          | 225. sejneński              | 0.446 | 2.384 | 0.309 | 3.416 | 0.409 | 0.055 |
|     |          | 226. siemiatycki            | 1.354 | 1.733 | 0.250 | 1.495 | 0.464 | 0.724 |
|     |          | 227. sokólski               | 1.242 | 1.834 | 1.935 | 1.977 | 1.044 | 0.302 |
|     |          | 228. suwalski               | 2.144 | 2.115 | 1.426 | 2.689 | 0.720 | 0.093 |
|     |          | 229. wysokomazowiecki       | 1.366 | 1.503 | 1.203 | 2.497 | 1.099 | 0.833 |

|     |           |                    |       |       |       |       |       |       |
|-----|-----------|--------------------|-------|-------|-------|-------|-------|-------|
|     |           | 230. zambrowski    | 1.302 | 1.033 | 0.877 | 2.620 | 1.683 | 0.839 |
|     |           | 231. c. Białystok  | 0.888 | 0.837 | 0.423 | 0.609 | 1.264 | 1.051 |
|     |           | 232. c. Łomża      | 1.994 | 1.009 | 2.074 | 0.949 | 0.995 | 1.140 |
|     |           | 233. c. Suwałki    | 1.019 | 1.007 | 0.003 | 0.451 | 1.238 | 0.916 |
| 11. | Pomerania | 234. bytowski      | 0.920 | 1.687 | 3.985 | 1.650 | 1.040 | 0.037 |
|     |           | 235. chojnicki     | 0.050 | 1.158 | 0.141 | 1.189 | 0.806 | 0.055 |
|     |           | 236. człuchowski   | 0.454 | 1.138 | 0.343 | 1.409 | 0.785 | 0.802 |
|     |           | 237. gdański       | 1.388 | 1.007 | 0.966 | 0.861 | 0.567 | 1.731 |
|     |           | 238. kartuski      | 0.475 | 1.167 | 0.442 | 1.034 | 0.909 | 1.204 |
|     |           | 239. kościerski    | 0.221 | 0.368 | 0.193 | 1.183 | 0.412 | 1.120 |
|     |           | 240. kwidzyński    | 1.168 | 1.306 | 2.593 | 0.955 | 0.705 | 0.908 |
|     |           | 241. lęborski      | 0.211 | 1.013 | 0.114 | 0.476 | 0.846 | 1.017 |
|     |           | 242. malborski     | 0.874 | 1.159 | 2.541 | 0.446 | 0.472 | 1.194 |
|     |           | 243. nowodworski   | 1.245 | 1.735 | 3.073 | 2.210 | 0.758 | 0.812 |
|     |           | 244. pucki         | 1.002 | 1.027 | 0.502 | 0.664 | 0.901 | 1.239 |
|     |           | 245. słupski       | 0.898 | 1.302 | 2.553 | 1.256 | 1.161 | 0.854 |
|     |           | 246. starogardzki  | 0.212 | 0.390 | 0.051 | 2.397 | 0.329 | 1.636 |
|     |           | 247. tczewski      | 0.859 | 1.301 | 2.967 | 1.037 | 0.843 | 0.803 |
|     |           | 248. wejherowski   | 1.474 | 1.221 | 2.085 | 1.211 | 0.687 | 1.146 |
|     |           | 249. sztumski      | 1.138 | 1.274 | 2.173 | 1.268 | 0.387 | 1.380 |
|     |           | 250. c. Gdańsk     | 1.369 | 0.838 | 0.053 | 0.170 | 0.827 | 2.009 |
|     |           | 251. c. Gdynia     | 2.769 | 1.318 | 2.249 | 0.974 | 1.128 | 0.779 |
|     |           | 252. c. Słupsk     | 1.433 | 1.043 | 3.104 | 1.911 | 1.103 | 0.741 |
|     |           | 253. c. Sopot      | 2.622 | 1.420 | 1.537 | 1.700 | 1.050 | 0.625 |
| 12. | Silesia   | 254. będziński     | 0.903 | 0.925 | 0.769 | 0.243 | 1.398 | 1.319 |
|     |           | 255. bielski       | 0.246 | 0.728 | 0.561 | 0.772 | 0.654 | 0.561 |
|     |           | 256. cieszyński    | 0.988 | 0.797 | 1.390 | 0.691 | 0.908 | 0.483 |
|     |           | 257. częstochowski | 0.348 | 1.414 | 1.833 | 0.901 | 0.441 | 0.593 |
|     |           | 258. gliwicki      | 1.035 | 0.858 | 0.870 | 0.325 | 1.452 | 1.423 |

|  |  |                              |       |       |       |       |       |       |
|--|--|------------------------------|-------|-------|-------|-------|-------|-------|
|  |  | 259. kłobucki                | 0.417 | 1.436 | 1.874 | 1.133 | 0.601 | 0.566 |
|  |  | 260. lubliniecki             | 0.433 | 1.369 | 2.072 | 0.681 | 0.656 | 0.953 |
|  |  | 261. mikołowski              | 0.990 | 0.934 | 0.492 | 0.243 | 1.341 | 1.176 |
|  |  | 262. myszkowski              | 0.659 | 1.042 | 1.750 | 0.785 | 0.520 | 1.003 |
|  |  | 263. pszczyński              | 1.027 | 0.811 | 1.073 | 0.534 | 0.999 | 0.376 |
|  |  | 264. raciborski              | 0.493 | 0.760 | 0.225 | 0.704 | 1.210 | 0.668 |
|  |  | 265. rybnicki                | 0.350 | 0.651 | 0.410 | 0.270 | 0.819 | 1.206 |
|  |  | 266. tarnogórski             | 0.815 | 0.910 | 1.228 | 0.092 | 1.923 | 1.154 |
|  |  | 267. bieruńsko-lędziański    | 0.736 | 0.552 | 1.001 | 0.494 | 0.947 | 0.948 |
|  |  | 268. wodzisławski            | 0.357 | 0.678 | 0.562 | 0.536 | 1.136 | 0.623 |
|  |  | 269. zawierciański           | 1.006 | 1.645 | 2.488 | 0.354 | 0.581 | 1.106 |
|  |  | 270. żywiecki                | 0.190 | 1.253 | 0.803 | 1.271 | 0.795 | 0.696 |
|  |  | 271. c. Bielsko-Biała        | 0.100 | 0.461 | 0.019 | 2.861 | 0.412 | 1.586 |
|  |  | 272. c. Bytom                | 1.955 | 0.947 | 1.016 | 0.095 | 1.116 | 0.407 |
|  |  | 273. c. Chorzów              | 0.955 | 0.705 | 0.000 | 0.181 | 1.627 | 1.728 |
|  |  | 274. c. Częstochowa          | 0.805 | 0.573 | 0.953 | 1.279 | 0.551 | 2.008 |
|  |  | 275. c. Dąbrowa Górnicza     | 1.294 | 1.104 | 0.000 | 0.000 | 0.860 | 1.537 |
|  |  | 276. c. Gliwice              | 2.522 | 0.712 | 1.757 | 0.212 | 1.795 | 0.822 |
|  |  | 277. c. Jastrzębie-Zdrój     | 0.930 | 0.963 | 1.733 | 0.698 | 1.603 | 1.082 |
|  |  | 278. c. Jaworzno             | 1.018 | 0.860 | 1.175 | 0.415 | 1.134 | 1.868 |
|  |  | 279. c. Katowice             | 1.784 | 0.732 | 0.474 | 0.430 | 1.967 | 0.800 |
|  |  | 280. c. Mysłowice            | 0.274 | 0.270 | 0.044 | 0.151 | 0.458 | 0.389 |
|  |  | 281. c. Piekary Śląskie      | 0.674 | 0.967 | 1.391 | 0.818 | 1.805 | 1.379 |
|  |  | 282. c. Ruda Śląska          | 0.842 | 0.826 | 1.209 | 0.136 | 1.649 | 1.661 |
|  |  | 283. c. Rybnik               | 0.932 | 0.695 | 1.475 | 0.252 | 0.902 | 1.041 |
|  |  | 284. c. Siemianowice Śląskie | 1.940 | 1.198 | 1.829 | 0.151 | 2.142 | 0.730 |
|  |  | 285. c. Sosnowiec            | 0.009 | 0.281 | 0.007 | 0.045 | 0.417 | 0.350 |
|  |  | 286. c. Świętochłowice       | 0.271 | 0.430 | 0.373 | 0.019 | 0.785 | 0.786 |
|  |  | 287. c. Tychy                | 2.016 | 1.124 | 1.976 | 0.010 | 0.961 | 1.085 |
|  |  | 288. c. Zabrze               | 1.870 | 1.178 | 2.534 | 0.062 | 1.065 | 1.089 |

|     |                   |                    |       |       |       |       |       |       |
|-----|-------------------|--------------------|-------|-------|-------|-------|-------|-------|
|     |                   | 289. c. Żory       | 1.608 | 0.979 | 0.102 | 1.252 | 0.949 | 1.340 |
| 13. | Świętokrzyskie    | 290. buski         | 0.654 | 2.040 | 1.121 | 1.716 | 1.146 | 0.223 |
|     |                   | 291. jędrzejowski  | 1.488 | 2.146 | 1.679 | 1.327 | 0.526 | 0.119 |
|     |                   | 292. kazimierski   | 0.018 | 1.998 | 0.165 | 0.509 | 1.628 | 0.013 |
|     |                   | 293. kielecki      | 0.829 | 2.006 | 1.815 | 1.257 | 0.581 | 0.348 |
|     |                   | 294. konecki       | 0.593 | 1.641 | 0.332 | 1.822 | 0.822 | 0.759 |
|     |                   | 295. opatowski     | 0.852 | 0.533 | 1.445 | 1.168 | 0.724 | 0.026 |
|     |                   | 296. ostrowiecki   | 2.285 | 0.398 | 0.643 | 0.682 | 1.129 | 0.215 |
|     |                   | 297. pińczowski    | 0.322 | 1.879 | 0.964 | 1.434 | 0.981 | 0.005 |
|     |                   | 298. sandomierski  | 1.530 | 0.563 | 0.780 | 0.667 | 0.471 | 0.097 |
|     |                   | 299. skarżyski     | 0.399 | 0.516 | 1.726 | 3.328 | 1.218 | 0.093 |
|     |                   | 300. starachowicki | 1.217 | 1.527 | 2.289 | 0.510 | 0.509 | 0.049 |
|     |                   | 301. staszowski    | 0.484 | 1.296 | 0.300 | 1.131 | 1.541 | 0.590 |
|     |                   | 302. włoszczowski  | 1.411 | 2.001 | 2.850 | 2.085 | 0.323 | 0.312 |
|     |                   | 303. c. Kielce     | 0.755 | 1.048 | 0.098 | 1.339 | 1.187 | 0.953 |
| 14. | Warmia and Mazury | 3014. bartoszycki  | 2.811 | 1.420 | 2.530 | 1.473 | 0.520 | 0.901 |
|     |                   | 305. braniewski    | 1.436 | 1.238 | 2.865 | 1.672 | 1.021 | 0.418 |
|     |                   | 306. działdowski   | 0.597 | 0.753 | 1.119 | 0.426 | 0.275 | 1.069 |
|     |                   | 307. elbląski      | 0.998 | 1.309 | 2.794 | 0.854 | 0.680 | 0.698 |
|     |                   | 308. ełcki         | 1.473 | 0.048 | 0.030 | 1.710 | 2.864 | 0.633 |
|     |                   | 309. giżycki       | 1.498 | 0.935 | 0.058 | 1.524 | 0.874 | 0.956 |
|     |                   | 310. iławski       | 1.111 | 1.512 | 1.225 | 0.859 | 0.795 | 1.245 |
|     |                   | 311. kętrzyński    | 0.725 | 0.649 | 1.409 | 0.647 | 0.301 | 1.499 |
|     |                   | 312. lidzbarski    | 2.920 | 1.933 | 3.459 | 3.305 | 0.298 | 0.390 |
|     |                   | 313. mrągowski     | 1.801 | 1.325 | 2.087 | 1.864 | 0.780 | 0.651 |
|     |                   | 314. nidzicki      | 0.680 | 1.075 | 1.350 | 0.811 | 0.547 | 0.891 |
|     |                   | 315. nowomiejski   | 0.275 | 1.153 | 0.753 | 2.215 | 0.844 | 0.861 |
|     |                   | 316. olecki        | 0.021 | 0.039 | 0.011 | 3.799 | 2.923 | 0.421 |
|     |                   | 317. olsztyński    | 1.759 | 1.773 | 2.617 | 1.986 | 1.247 | 0.280 |

|     |              |                               |       |       |       |       |       |       |
|-----|--------------|-------------------------------|-------|-------|-------|-------|-------|-------|
|     |              | 318. ostródzki                | 0.455 | 1.164 | 0.812 | 1.166 | 1.771 | 0.351 |
|     |              | 319. piski                    | 1.706 | 1.435 | 1.283 | 3.226 | 1.814 | 0.244 |
|     |              | 320. szczycieński             | 1.235 | 1.632 | 2.396 | 1.895 | 0.747 | 0.676 |
|     |              | 321. gołdapski                | 0.228 | 0.300 | 0.065 | 2.747 | 2.035 | 0.309 |
|     |              | 322. węgorzewski              | 0.840 | 1.186 | 0.001 | 2.776 | 0.846 | 0.841 |
|     |              | 323. c. Elbląg                | 1.739 | 0.623 | 1.373 | 0.288 | 1.281 | 1.633 |
|     |              | 324. c. Olsztyn               | 2.345 | 0.948 | 1.559 | 0.697 | 1.143 | 1.184 |
| 15. | Wielkopolska | 325. chodzieski               | 1.569 | 1.648 | 3.107 | 0.314 | 0.602 | 0.976 |
|     |              | 326. czarnkowsko-trzcianiecki | 0.395 | 1.433 | 1.333 | 2.039 | 1.648 | 0.900 |
|     |              | 327. gnieźnieński             | 0.441 | 1.153 | 0.712 | 0.911 | 0.906 | 1.421 |
|     |              | 328. gostyński                | 0.508 | 1.979 | 2.268 | 1.803 | 1.082 | 1.064 |
|     |              | 329. grodziski                | 0.667 | 2.718 | 3.362 | 0.997 | 1.233 | 0.251 |
|     |              | 330. jarociński               | 1.033 | 1.982 | 1.596 | 1.901 | 0.497 | 1.310 |
|     |              | 331. kaliski                  | 0.089 | 1.558 | 0.124 | 1.173 | 0.531 | 0.357 |
|     |              | 332. kępiński                 | 0.000 | 1.599 | 0.000 | 0.001 | 1.300 | 0.167 |
|     |              | 333. kolski                   | 0.755 | 1.303 | 1.492 | 0.766 | 0.458 | 1.160 |
|     |              | 334. koniński                 | 1.462 | 1.204 | 2.146 | 0.889 | 0.333 | 0.989 |
|     |              | 335. kościański               | 0.768 | 2.490 | 2.722 | 0.579 | 1.019 | 0.654 |
|     |              | 336. krotoszyński             | 0.522 | 1.389 | 2.338 | 1.045 | 0.498 | 1.609 |
|     |              | 337. leszczyński              | 0.893 | 2.069 | 2.831 | 3.507 | 1.152 | 0.636 |
|     |              | 338. międzychodzki            | 1.266 | 1.322 | 2.792 | 0.356 | 1.806 | 0.703 |
|     |              | 339. nowotomyski              | 0.823 | 1.717 | 2.562 | 0.651 | 1.152 | 1.014 |
|     |              | 340. obornicki                | 0.703 | 1.488 | 1.822 | 0.981 | 0.769 | 1.571 |
|     |              | 341. ostrowski                | 1.100 | 1.774 | 1.736 | 1.343 | 1.132 | 0.434 |
|     |              | 342. ostrzeszowski            | 0.275 | 1.167 | 0.069 | 0.387 | 1.094 | 1.584 |
|     |              | 343. pilski                   | 1.315 | 1.026 | 2.254 | 0.226 | 1.288 | 0.901 |
|     |              | 344. pleszewski               | 0.858 | 1.527 | 2.247 | 2.087 | 1.573 | 0.377 |
|     |              | 345. poznański                | 2.048 | 1.041 | 1.726 | 0.415 | 0.634 | 1.502 |
|     |              | 346. rawicki                  | 1.323 | 1.892 | 3.070 | 2.825 | 0.908 | 0.688 |
|     |              | 347. słupecki                 | 0.556 | 1.321 | 1.934 | 0.868 | 0.450 | 1.307 |

|     |                |                   |       |       |       |       |       |       |
|-----|----------------|-------------------|-------|-------|-------|-------|-------|-------|
|     |                | 348. szamotulski  | 1.096 | 1.439 | 2.527 | 0.256 | 0.664 | 1.346 |
|     |                | 349. średzki      | 0.961 | 0.830 | 1.152 | 0.741 | 0.868 | 0.746 |
|     |                | 350. śremski      | 1.418 | 1.196 | 1.862 | 0.498 | 0.789 | 1.541 |
|     |                | 351. turecki      | 0.391 | 1.080 | 0.956 | 0.804 | 0.909 | 0.529 |
|     |                | 352. wągrowiecki  | 0.927 | 1.518 | 2.721 | 0.875 | 0.654 | 1.282 |
|     |                | 353. wolsztyński  | 0.780 | 1.413 | 3.834 | 1.169 | 1.080 | 0.779 |
|     |                | 354. wrzesiński   | 1.450 | 1.220 | 2.124 | 0.348 | 0.630 | 1.473 |
|     |                | 355. złotowski    | 0.377 | 0.699 | 1.790 | 0.612 | 2.062 | 0.497 |
|     |                | 356. c. Kalisz    | 1.328 | 0.715 | 0.418 | 0.740 | 0.967 | 0.815 |
|     |                | 357. c. Konin     | 1.319 | 0.799 | 1.599 | 0.020 | 0.389 | 2.080 |
|     |                | 358. c. Leszno    | 1.273 | 1.171 | 1.675 | 1.614 | 0.933 | 1.527 |
|     |                | 359. c. Poznań    | 2.188 | 1.327 | 1.309 | 1.420 | 1.070 | 1.255 |
| 16. | West Pomerania | 360. białogardzki | 2.023 | 1.295 | 1.324 | 0.918 | 1.084 | 0.869 |
|     |                | 361. choszczeński | 0.571 | 1.259 | 1.319 | 0.954 | 2.503 | 0.280 |
|     |                | 362. drawski      | 0.499 | 0.951 | 1.023 | 0.048 | 1.624 | 0.837 |
|     |                | 363. goleniowski  | 0.744 | 1.282 | 2.243 | 0.810 | 1.370 | 1.249 |
|     |                | 364. gryficki     | 0.849 | 1.008 | 1.605 | 1.273 | 1.187 | 1.230 |
|     |                | 365. gryfiński    | 1.219 | 1.357 | 0.109 | 0.367 | 2.060 | 0.681 |
|     |                | 366. kamieński    | 1.069 | 1.154 | 1.642 | 1.469 | 1.321 | 1.135 |
|     |                | 367. kołobrzesci  | 0.451 | 0.595 | 0.166 | 0.747 | 0.687 | 1.423 |
|     |                | 368. koszaliński  | 0.699 | 1.576 | 0.162 | 1.057 | 1.141 | 0.943 |
|     |                | 369. myśliborski  | 0.957 | 1.117 | 0.491 | 0.896 | 1.406 | 1.293 |
|     |                | 370. policki      | 2.033 | 0.926 | 0.826 | 1.136 | 1.130 | 1.462 |
|     |                | 371. pyrzycki     | 0.772 | 1.611 | 0.011 | 1.309 | 1.424 | 0.519 |
|     |                | 372. sławieński   | 1.057 | 1.637 | 0.426 | 3.956 | 1.017 | 1.261 |
|     |                | 373. stargardzki  | 1.449 | 1.297 | 1.068 | 0.838 | 1.235 | 1.079 |
|     |                | 374. szczecinecki | 1.351 | 1.340 | 0.087 | 0.867 | 1.172 | 0.900 |
|     |                | 375. świdwiński   | 0.474 | 1.148 | 1.442 | 0.169 | 1.355 | 0.810 |
|     |                | 376. wałecki      | 1.392 | 1.229 | 1.186 | 0.422 | 1.660 | 0.582 |
|     |                | 377. łobeski      | 0.320 | 1.175 | 1.749 | 0.681 | 1.040 | 1.268 |

|  |  |                     |       |       |       |       |       |       |
|--|--|---------------------|-------|-------|-------|-------|-------|-------|
|  |  | 378. c. Koszalin    | 2.293 | 1.086 | 0.308 | 1.127 | 0.493 | 1.392 |
|  |  | 379. c. Szczecin    | 3.369 | 1.177 | 0.595 | 1.418 | 1.303 | 0.912 |
|  |  | 380. c. Świnoujście | 0.618 | 0.676 | 0.012 | 1.291 | 2.354 | 0.807 |

*Source:* own elaboration
