# Supplementary material for: The Evaluation of Municipal Waste in Counties in Poland with the Use of the Theory of Phenomena Spatial Concentration
Source: MDPI journal article supplement (doi:10.3390/ijerph17239107), 2020-12-06
Supplement: s1 [file s1]

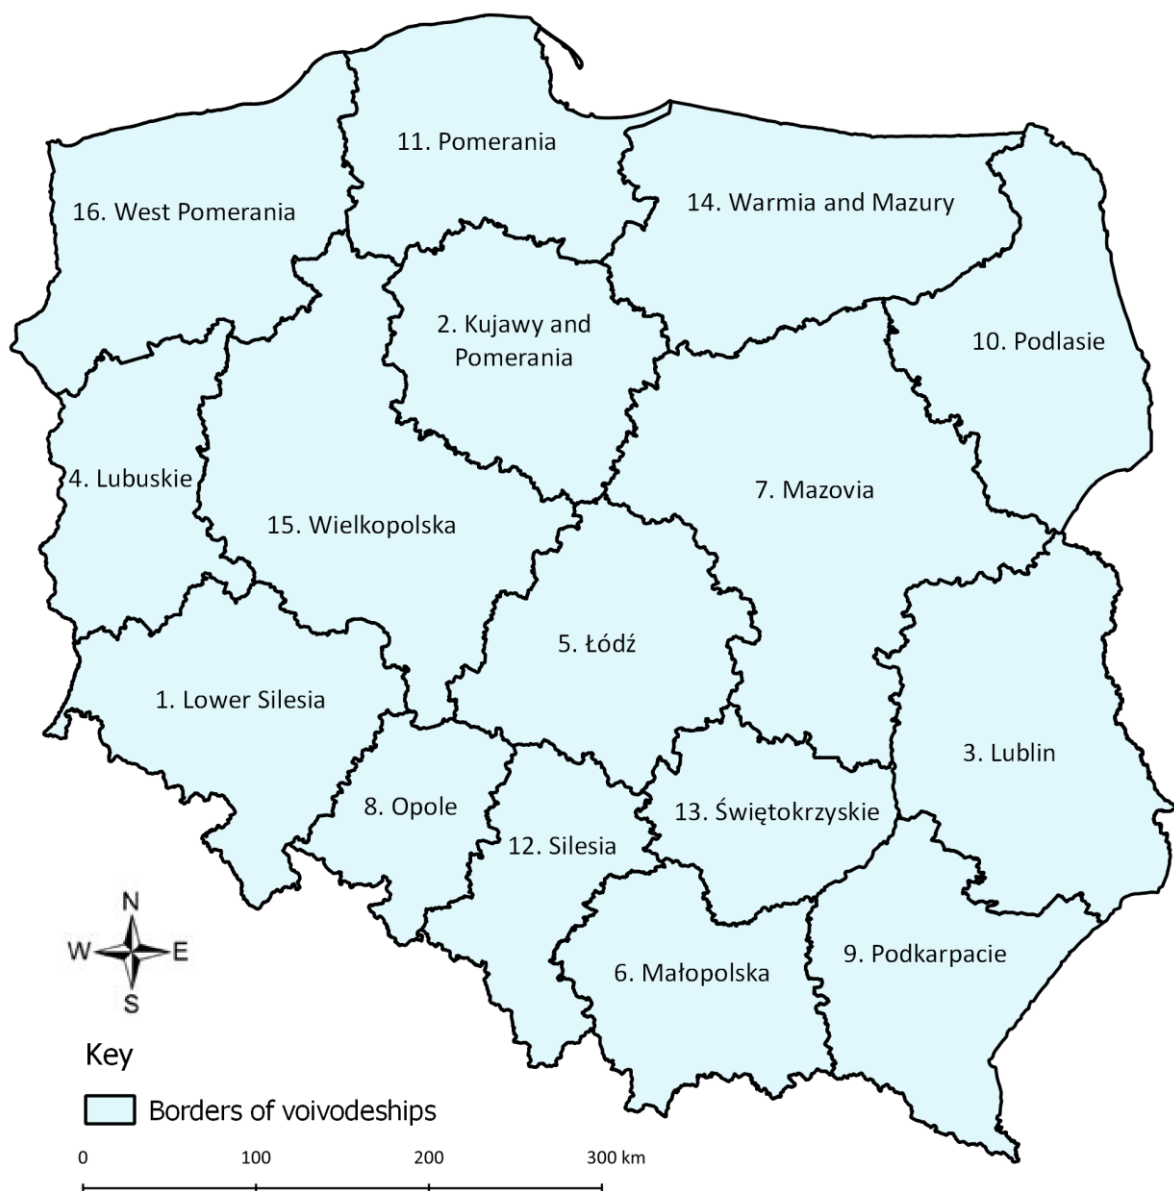

**Fig. 1.** The administrative division of Poland – voivodeships

*Source:* Own elaboration

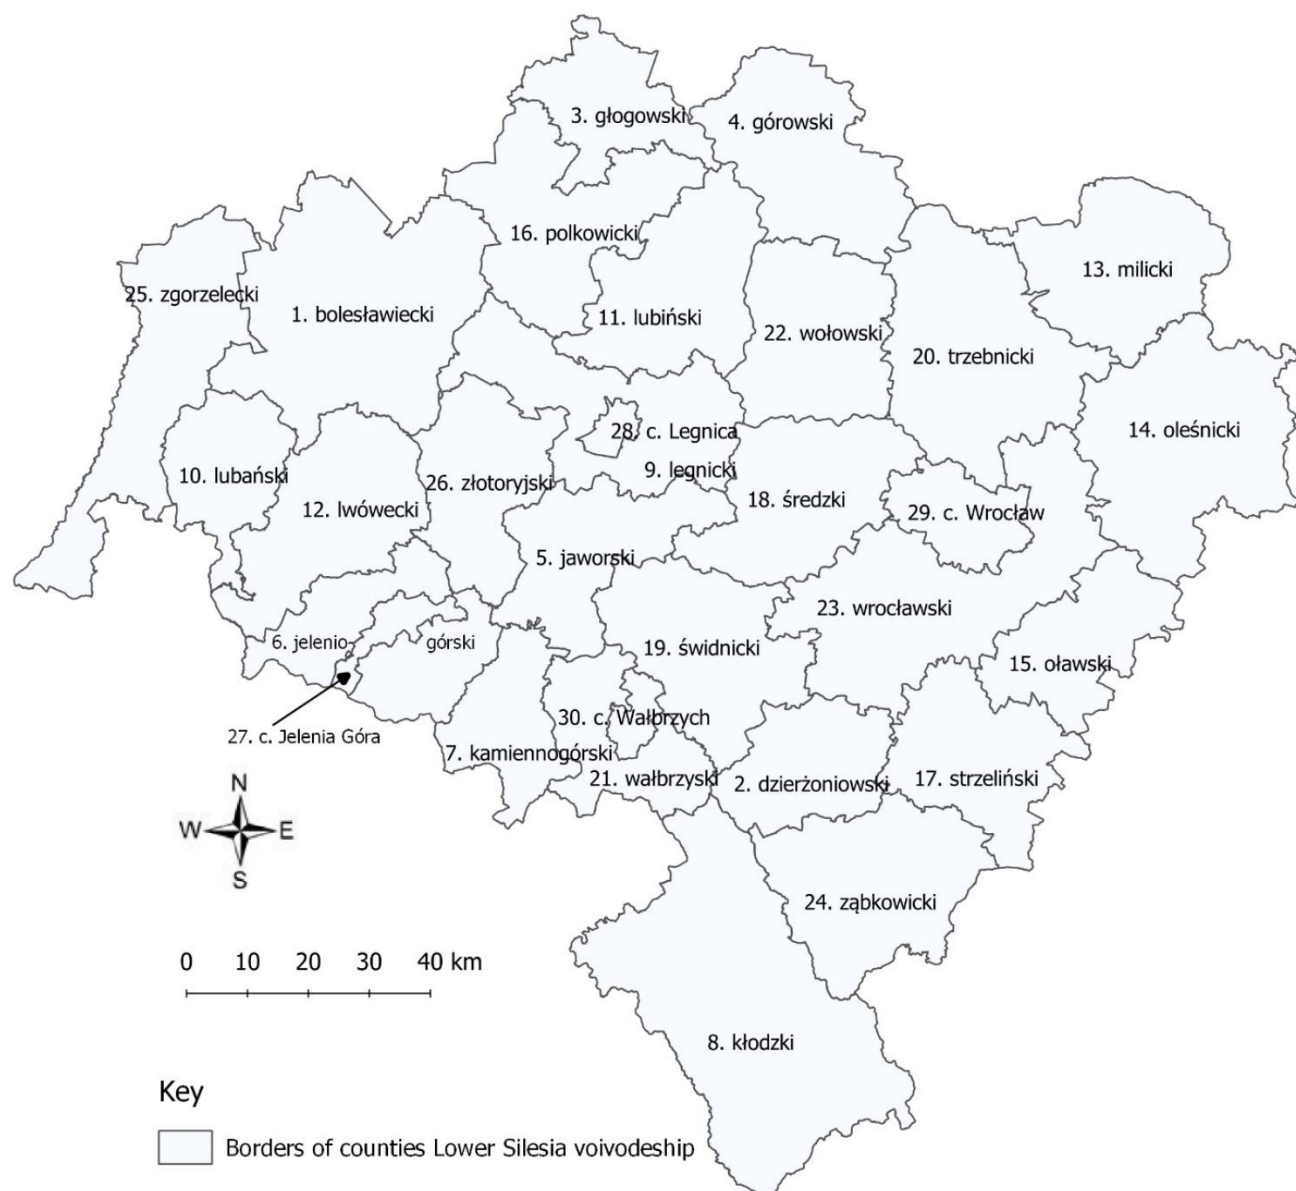

**Fig. 2.** Counties in Lower Silesia voivodeship

*Source:* Own elaboration

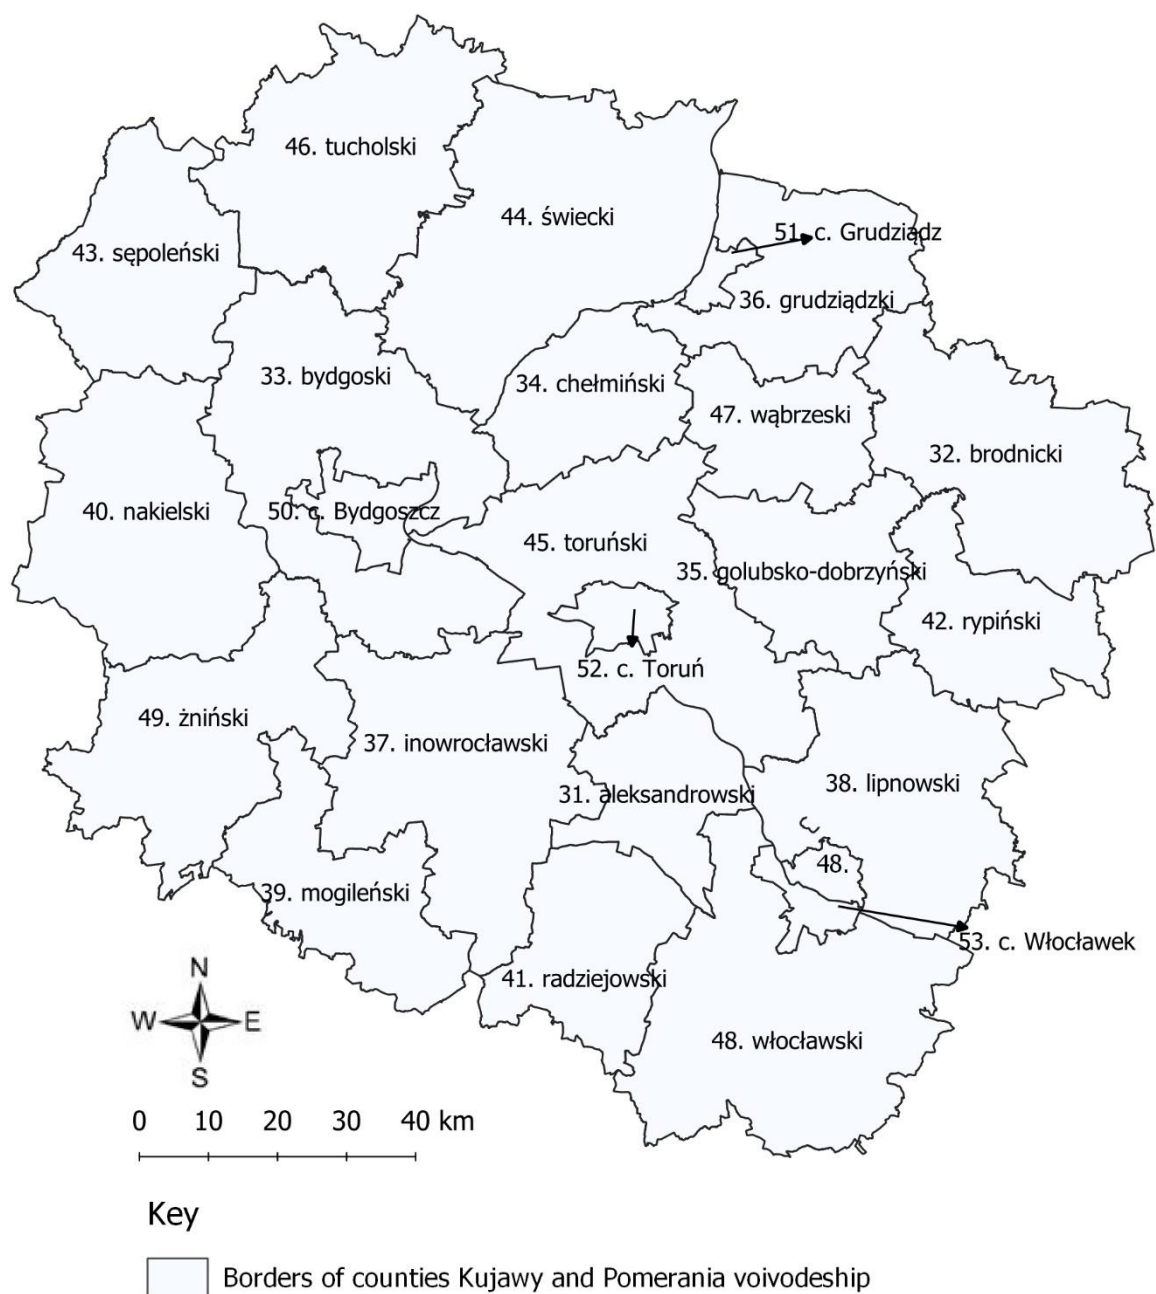

**Fig .3.** Counties in Kujawy and Pomerania voivodeship

*Source: Own elaboration*

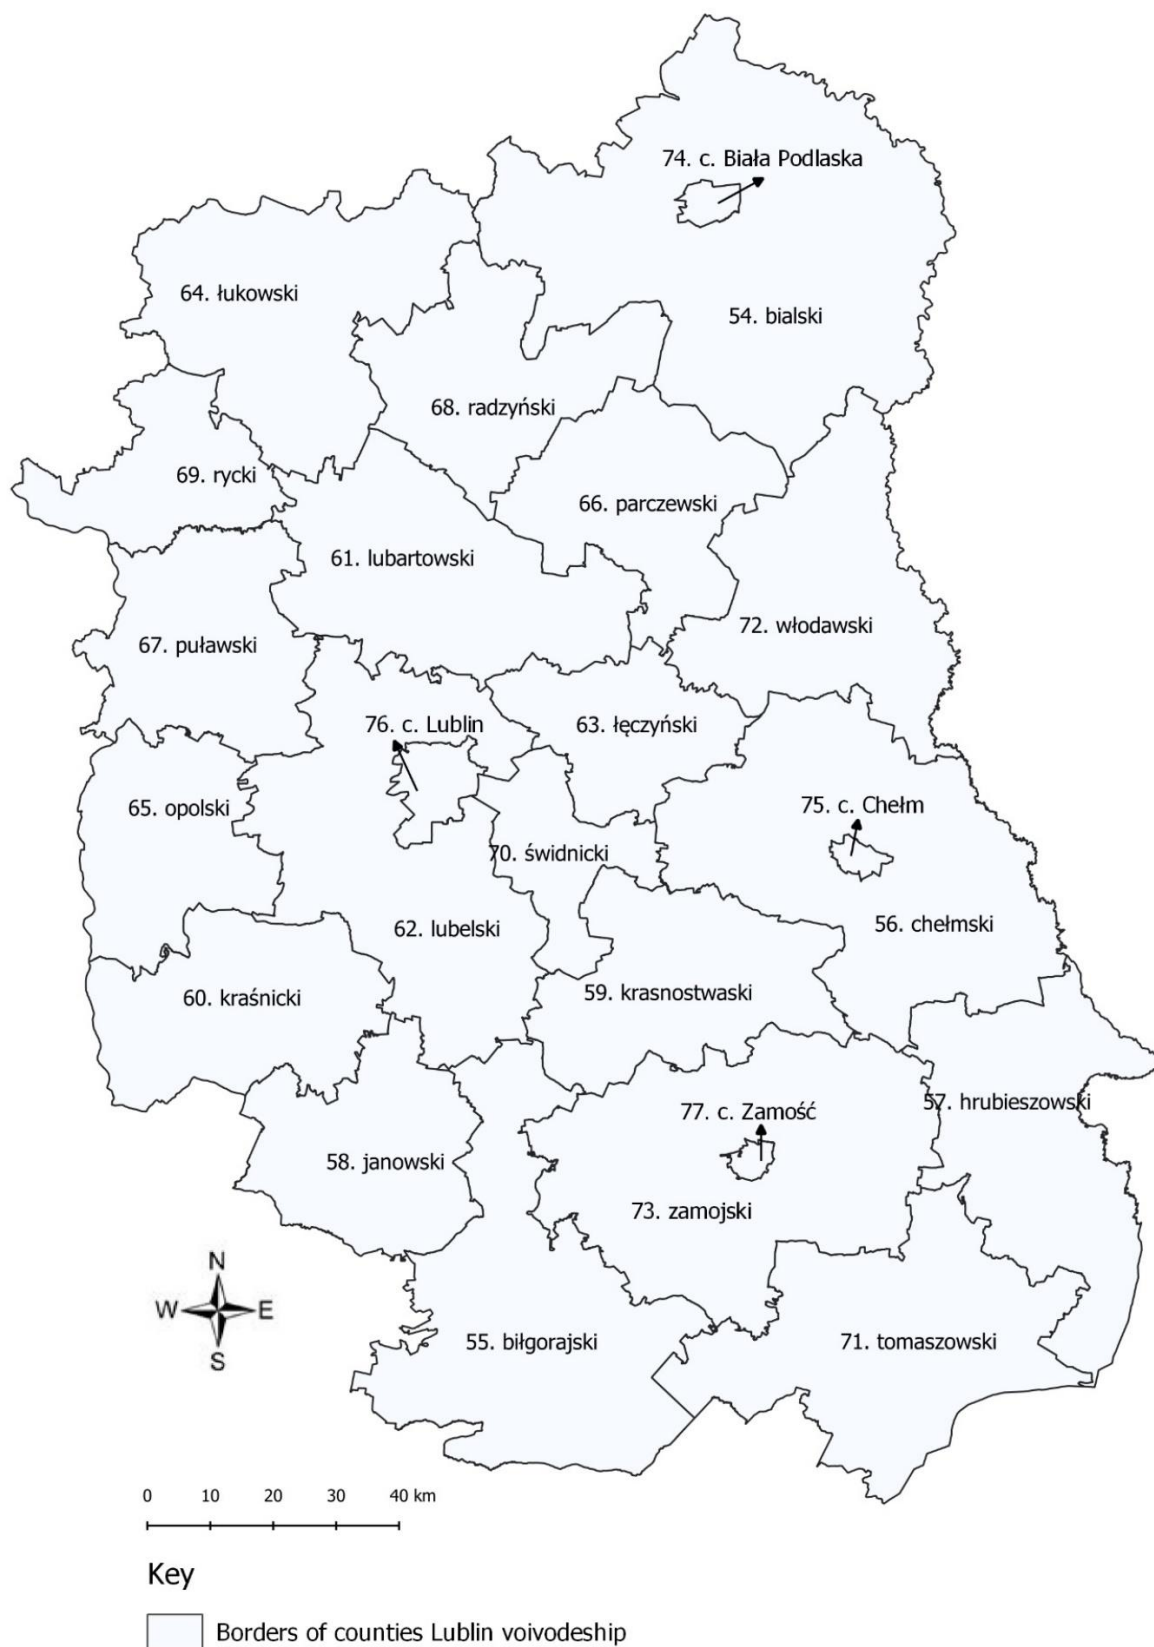

**Fig.4.** Counties in Lublin voivodeship

*Source: Own elaboration*

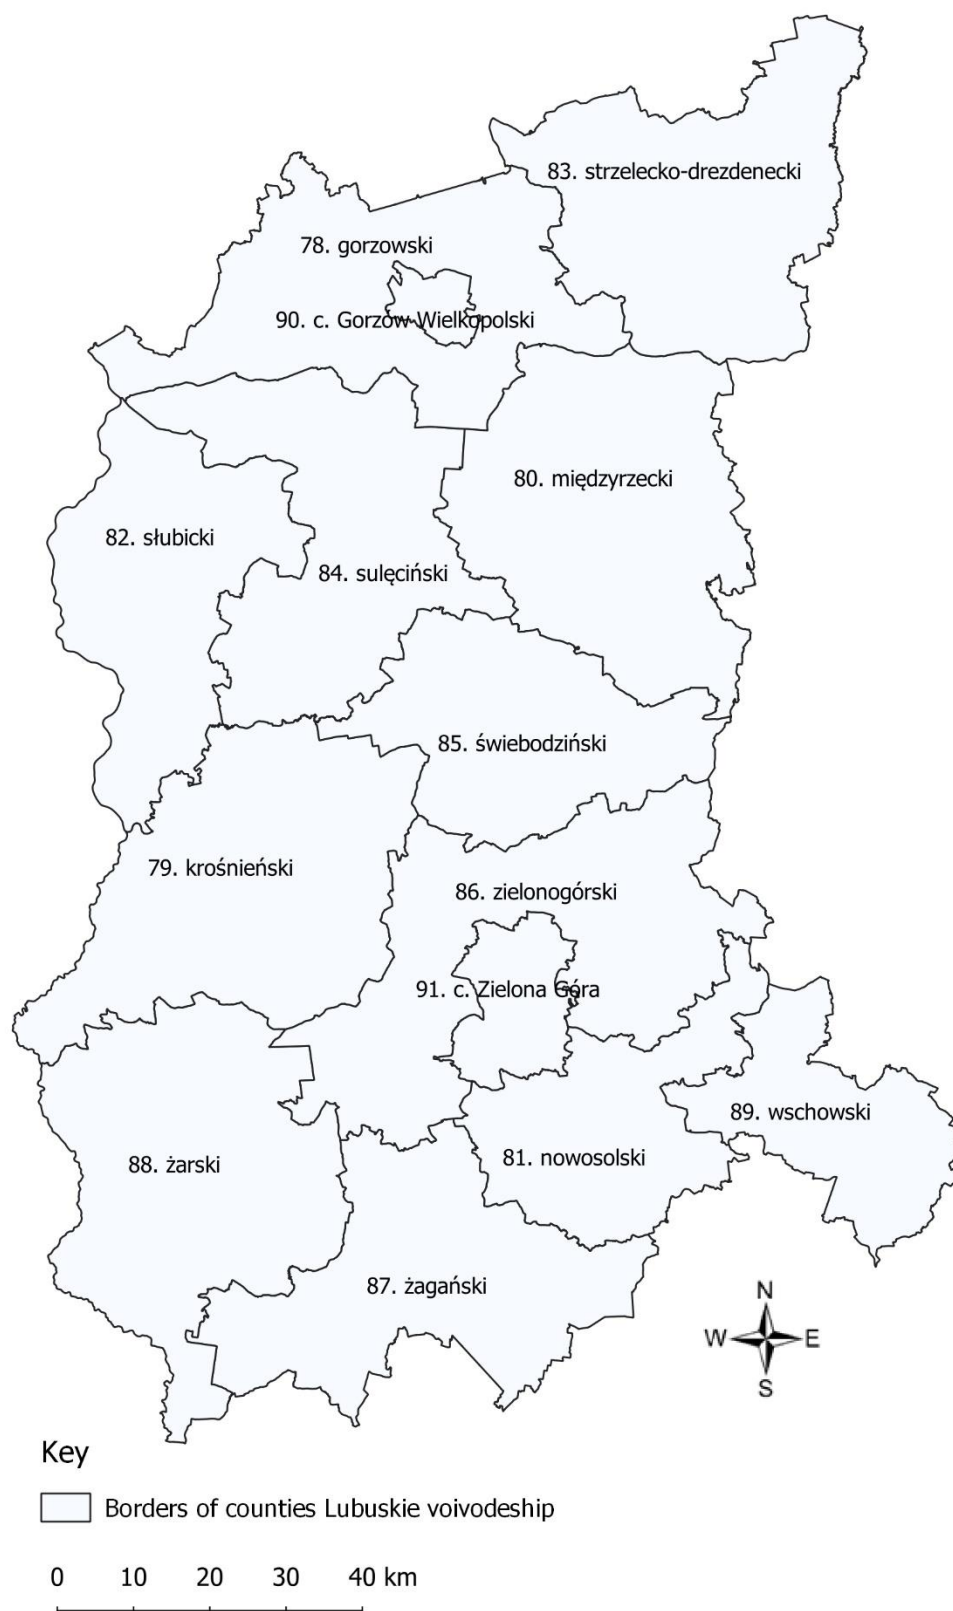

**Fig. 5.** Counties in Lubuskie voivodeship

*Source: Own elaboration*

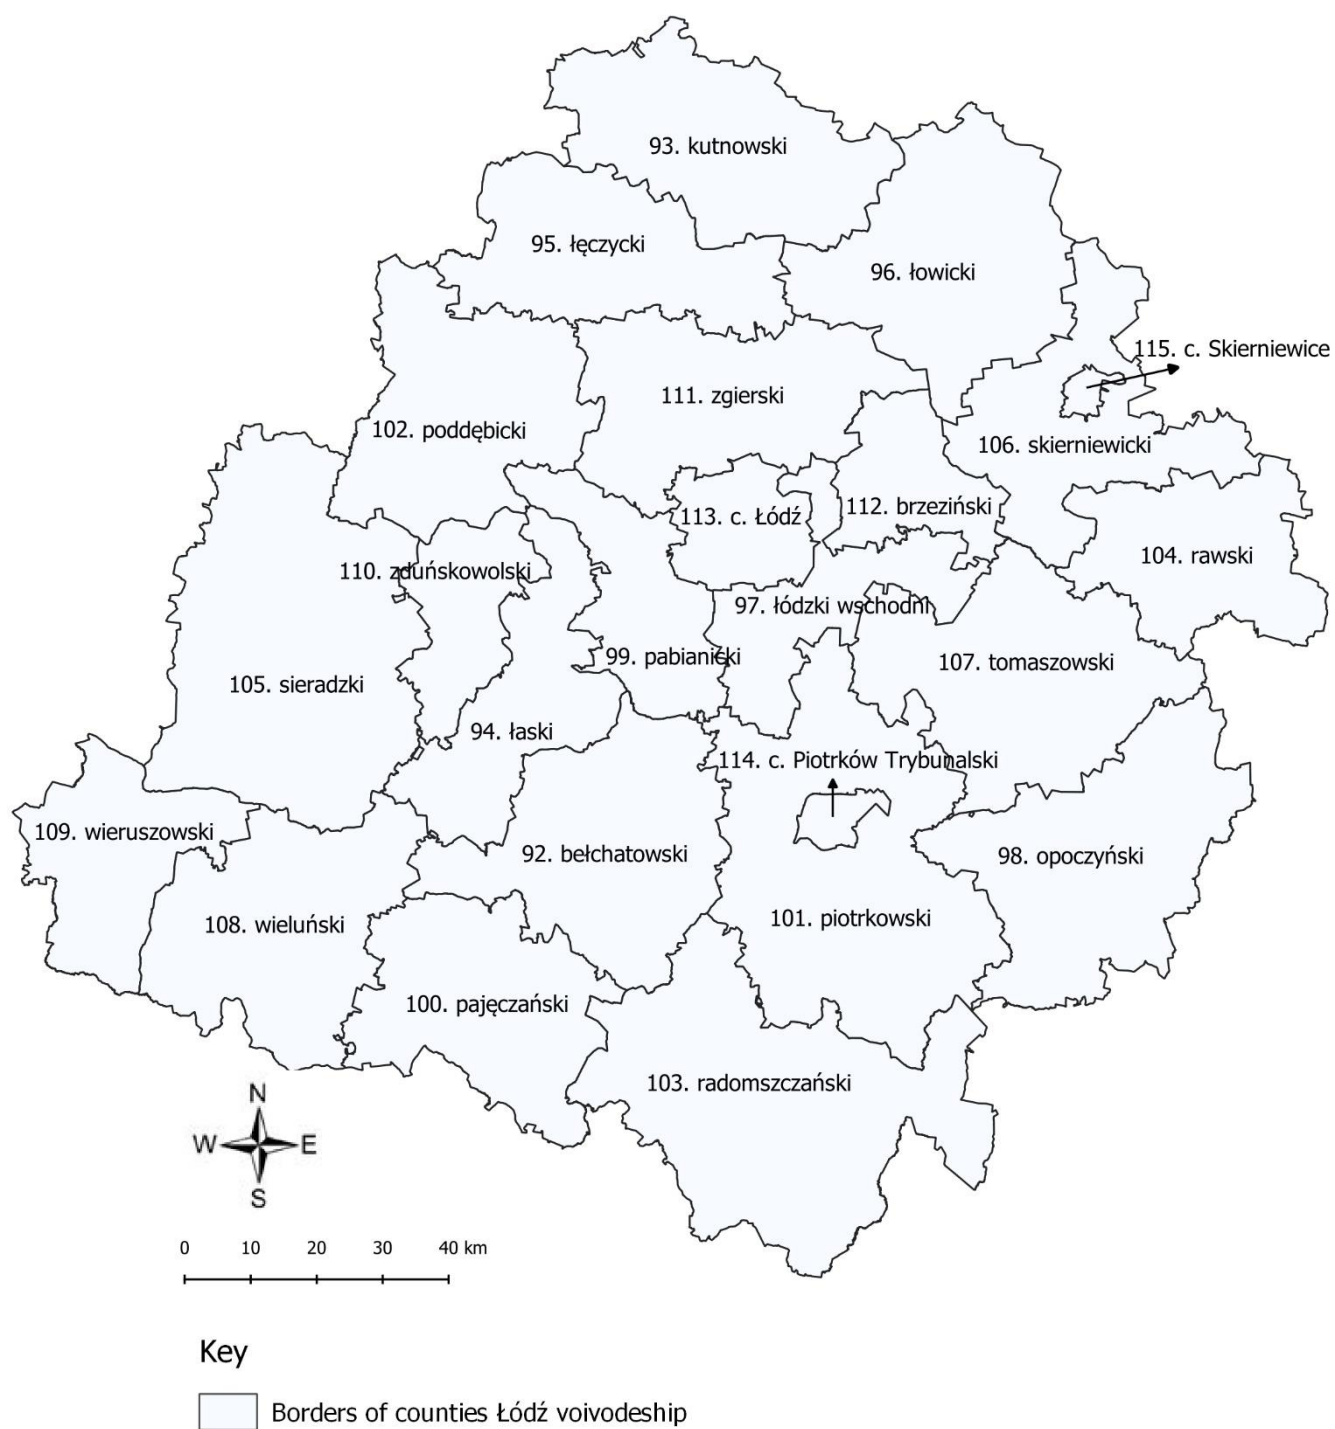

**Fig. 6.** Counties in Łódź voivodeship

*Source: Own elaboration*

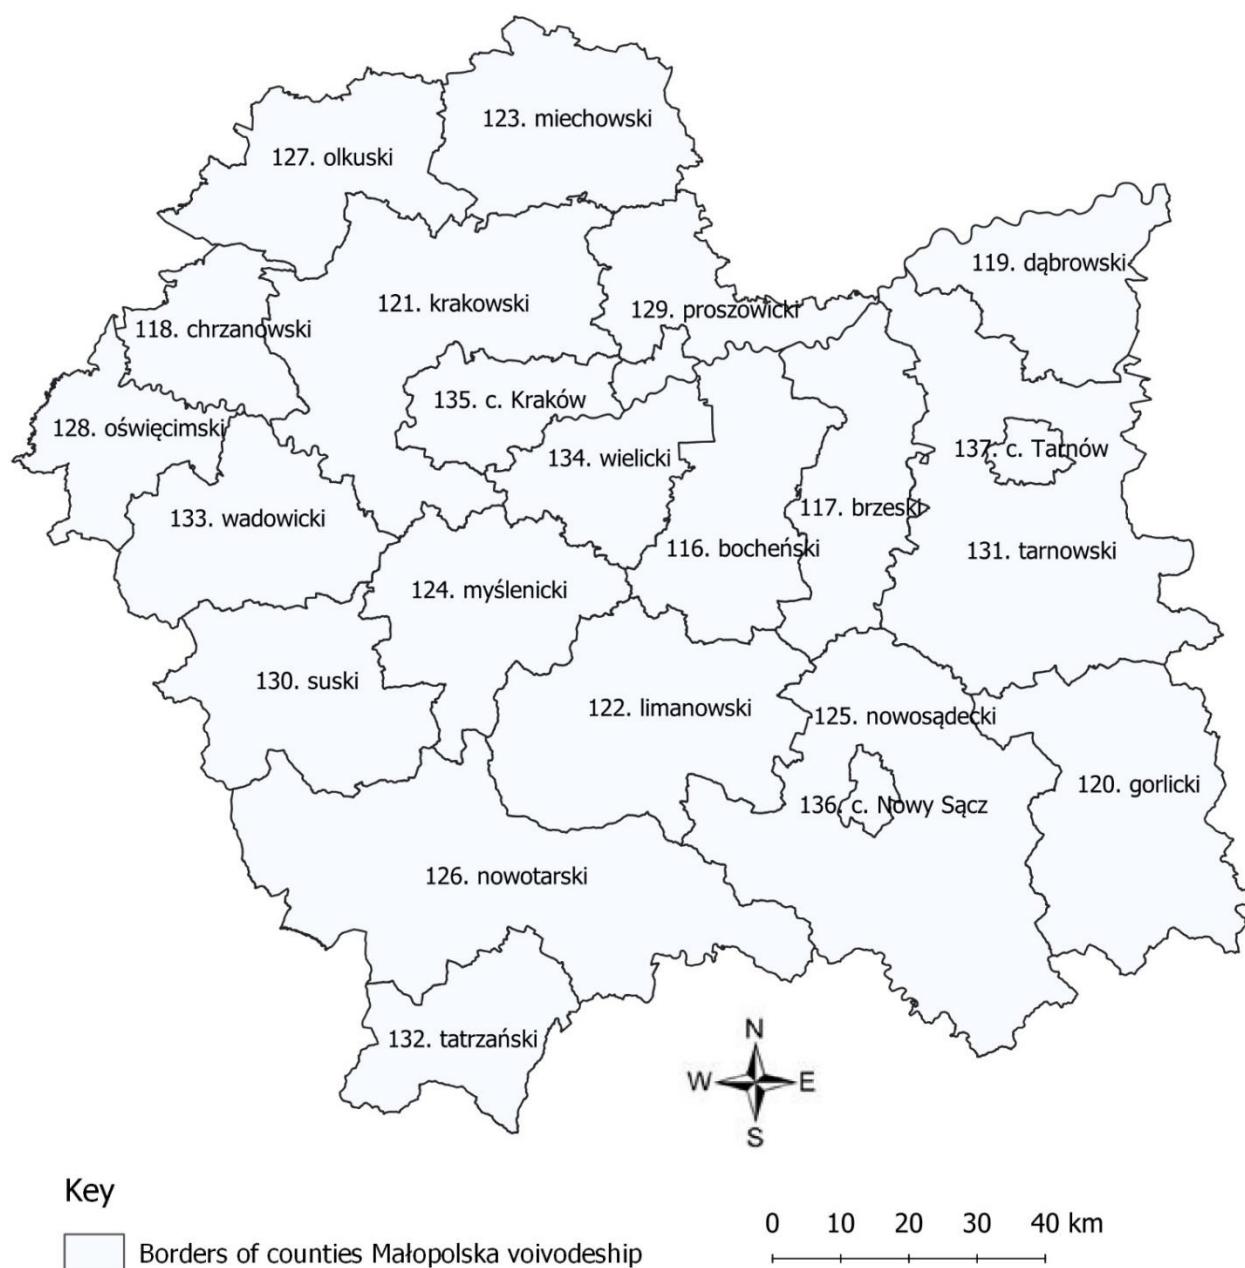

**Fig. 7.** Counties in Małopolska voivodeship

*Source: Own elaboration*

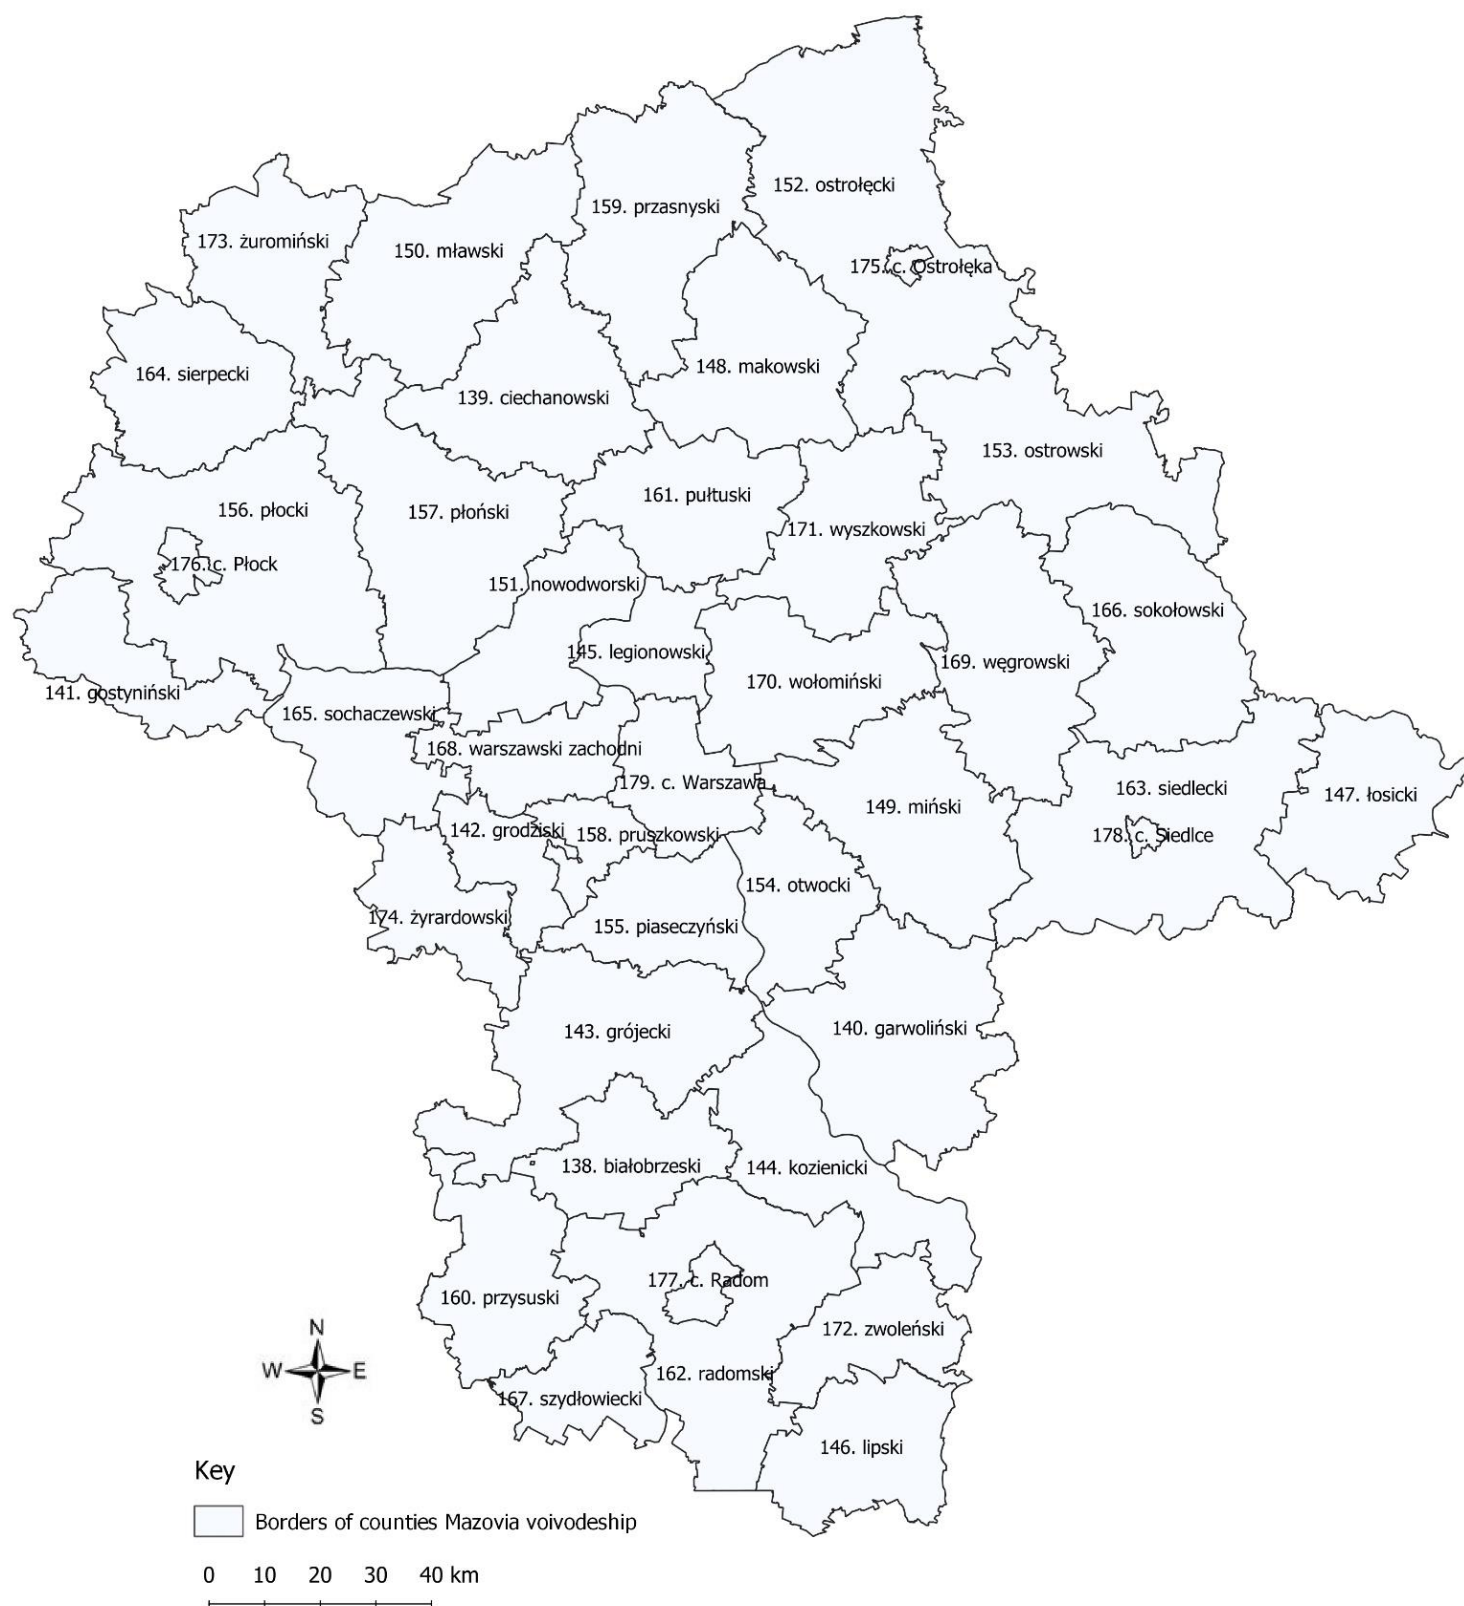

**Fig. 8.** Counties in Mazovia Voivodeship

*Source: Own elaboration*

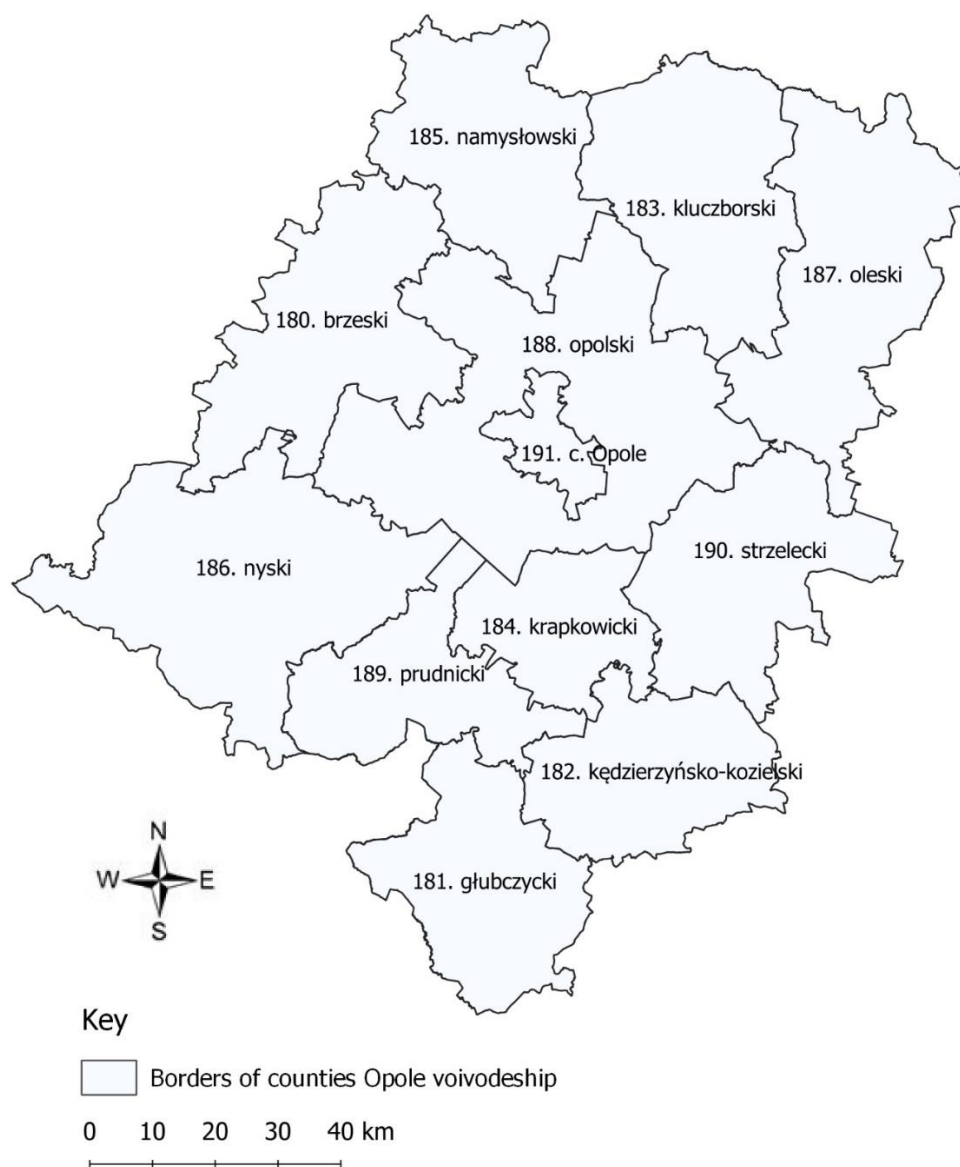

**Fig. 9.** Counties in Opole voivodeship

*Source: Own elaboration*

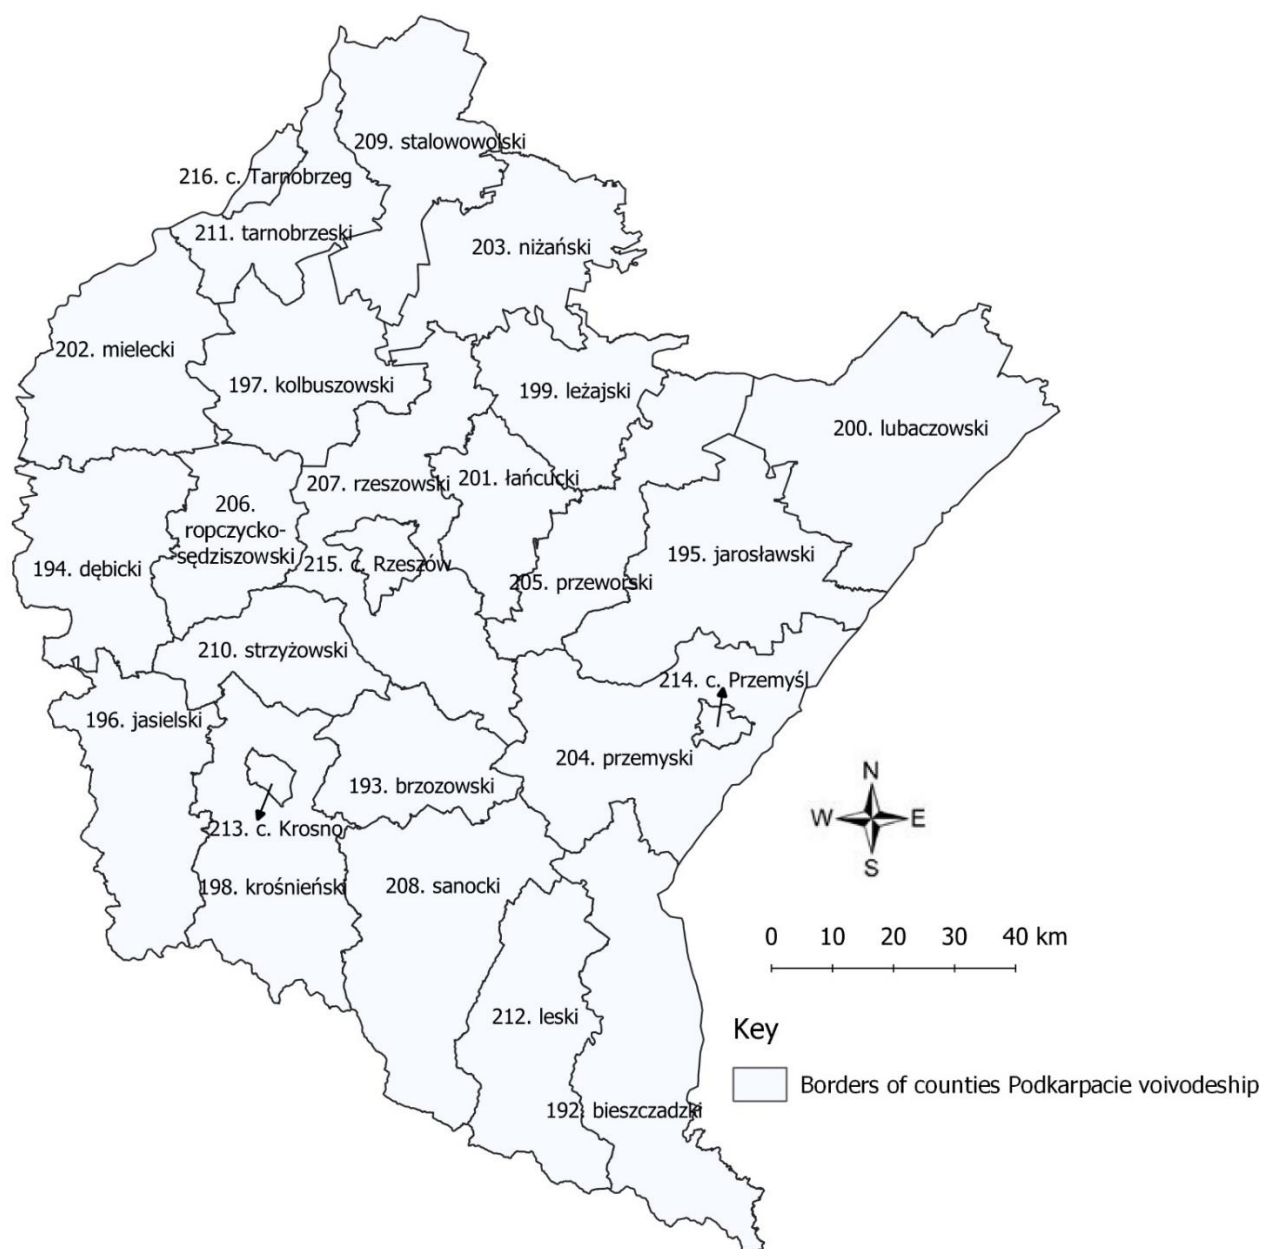

**Fig. 10.** Counties in Podkarpacie voivodeship

*Source: Own elaboration*

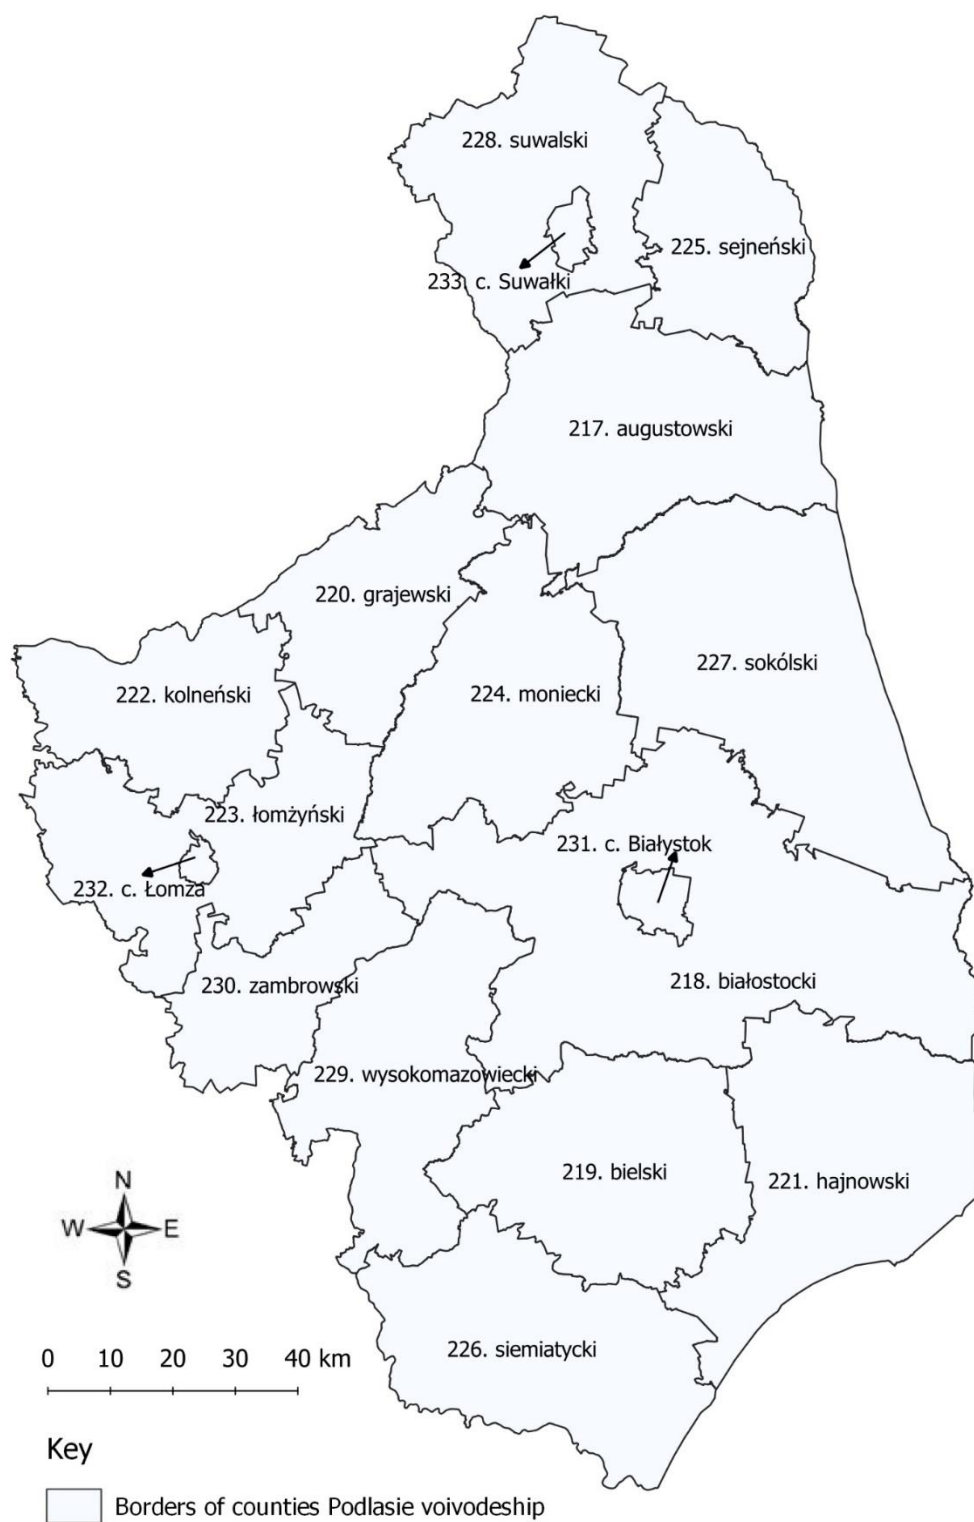

**Fig. 11.** Counties in Podlasie voivodeship

*Source: Own elaboration*

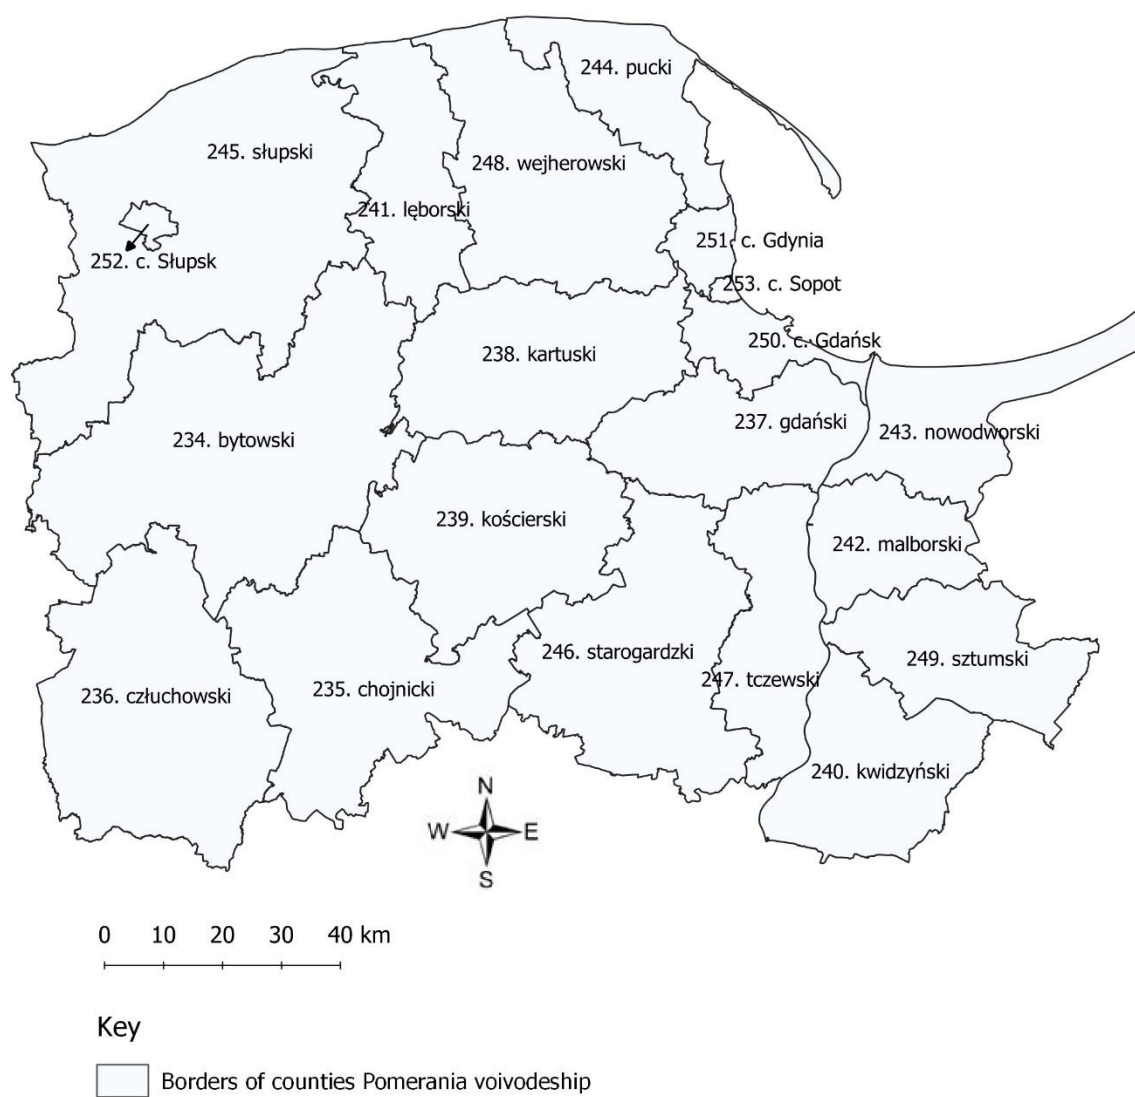

**Fig. 12.** Counties in Pomerania voivodeship

*Source: Own elaboration*

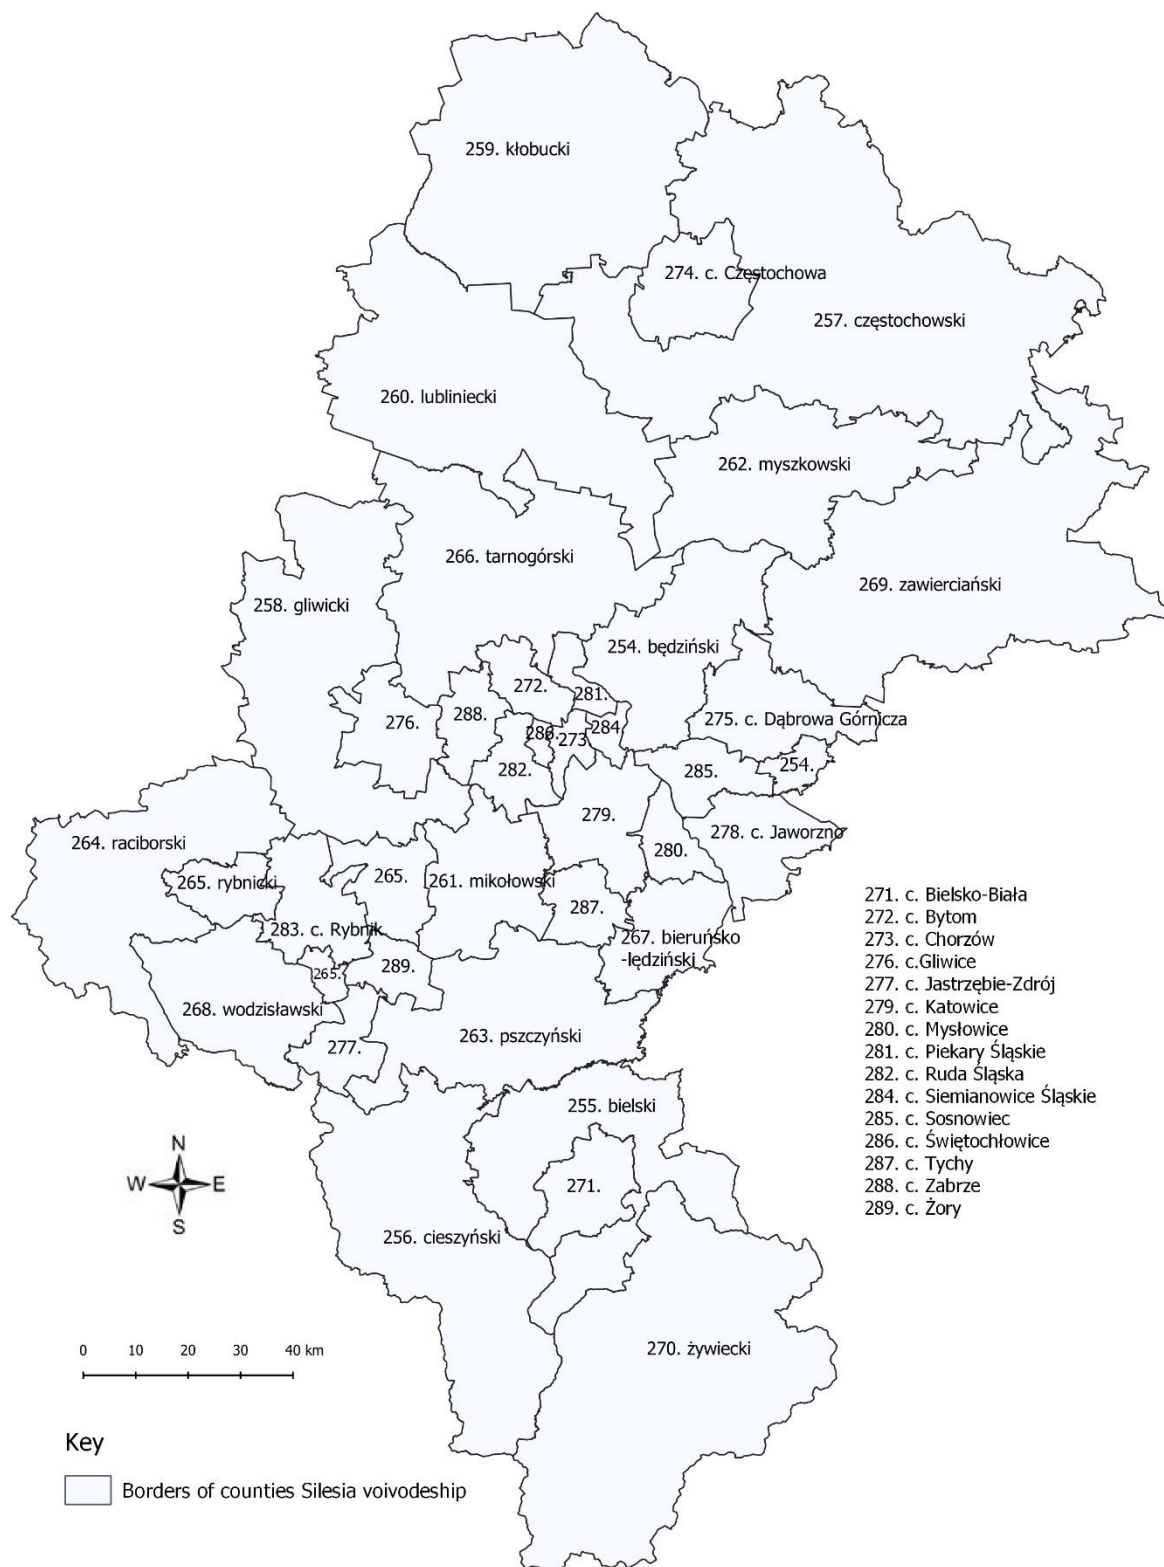

**Fig. 13.** Counties in Silesia voivodeship

*Source: Own elaboration*

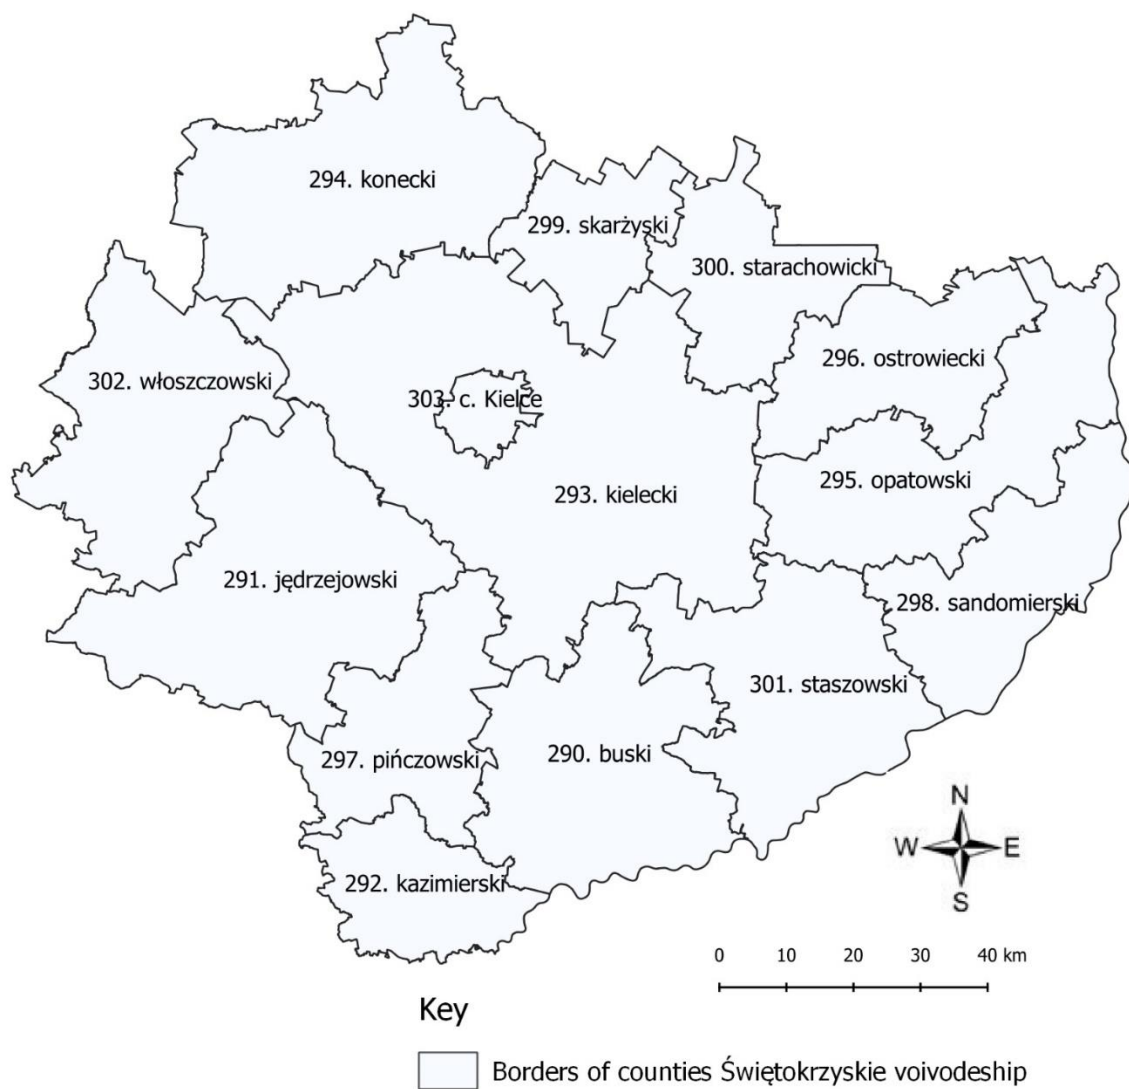

**Fig. 14.** Counties in Świętokrzyskie voivodeship

*Source: Own elaboration*

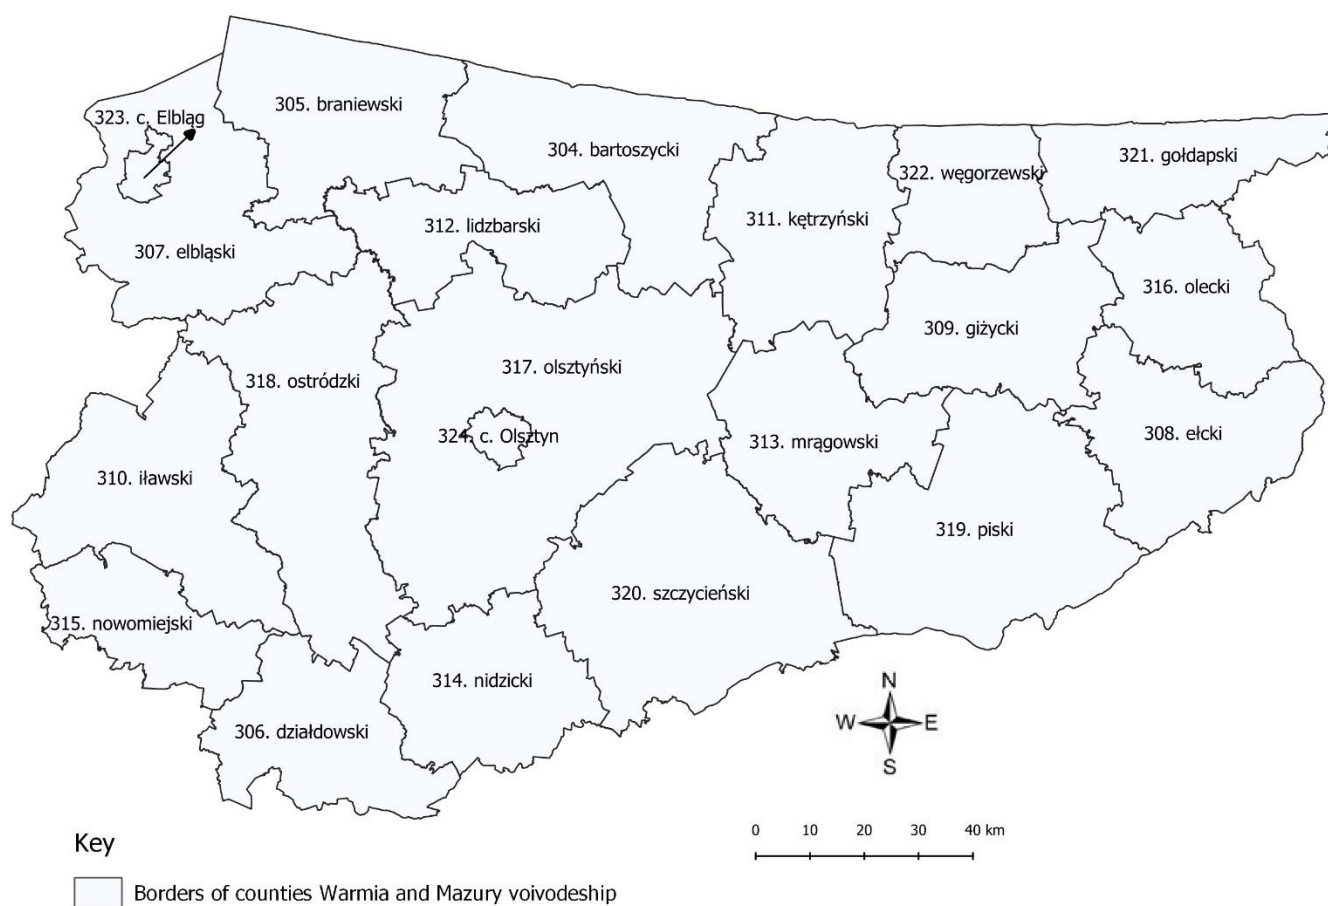

**Fig. 15.** Counties in Warmia and Mazury voivodeship

*Source: Own elaboration*

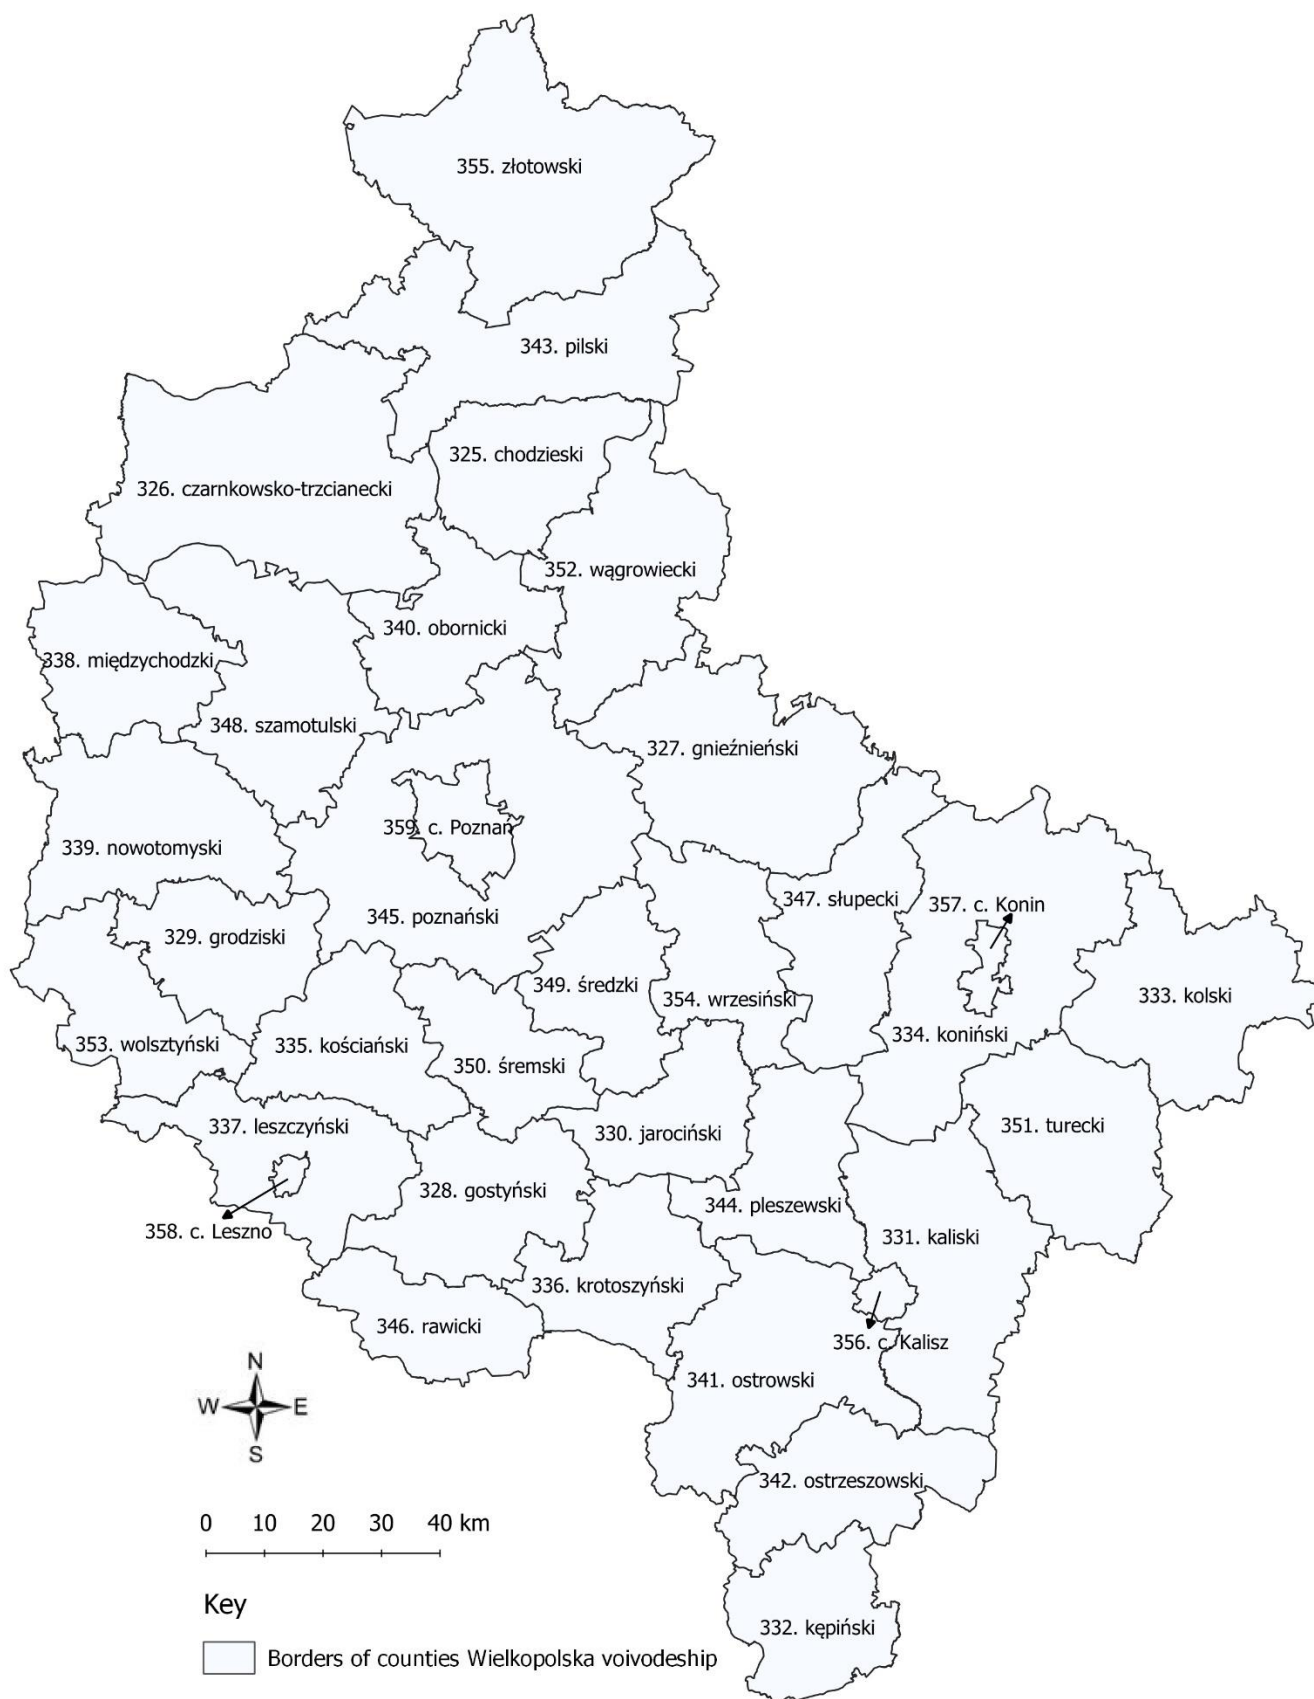

**Fig. 16.** Counties in Wielkopolska voivodeship

*Source: Own elaboration*

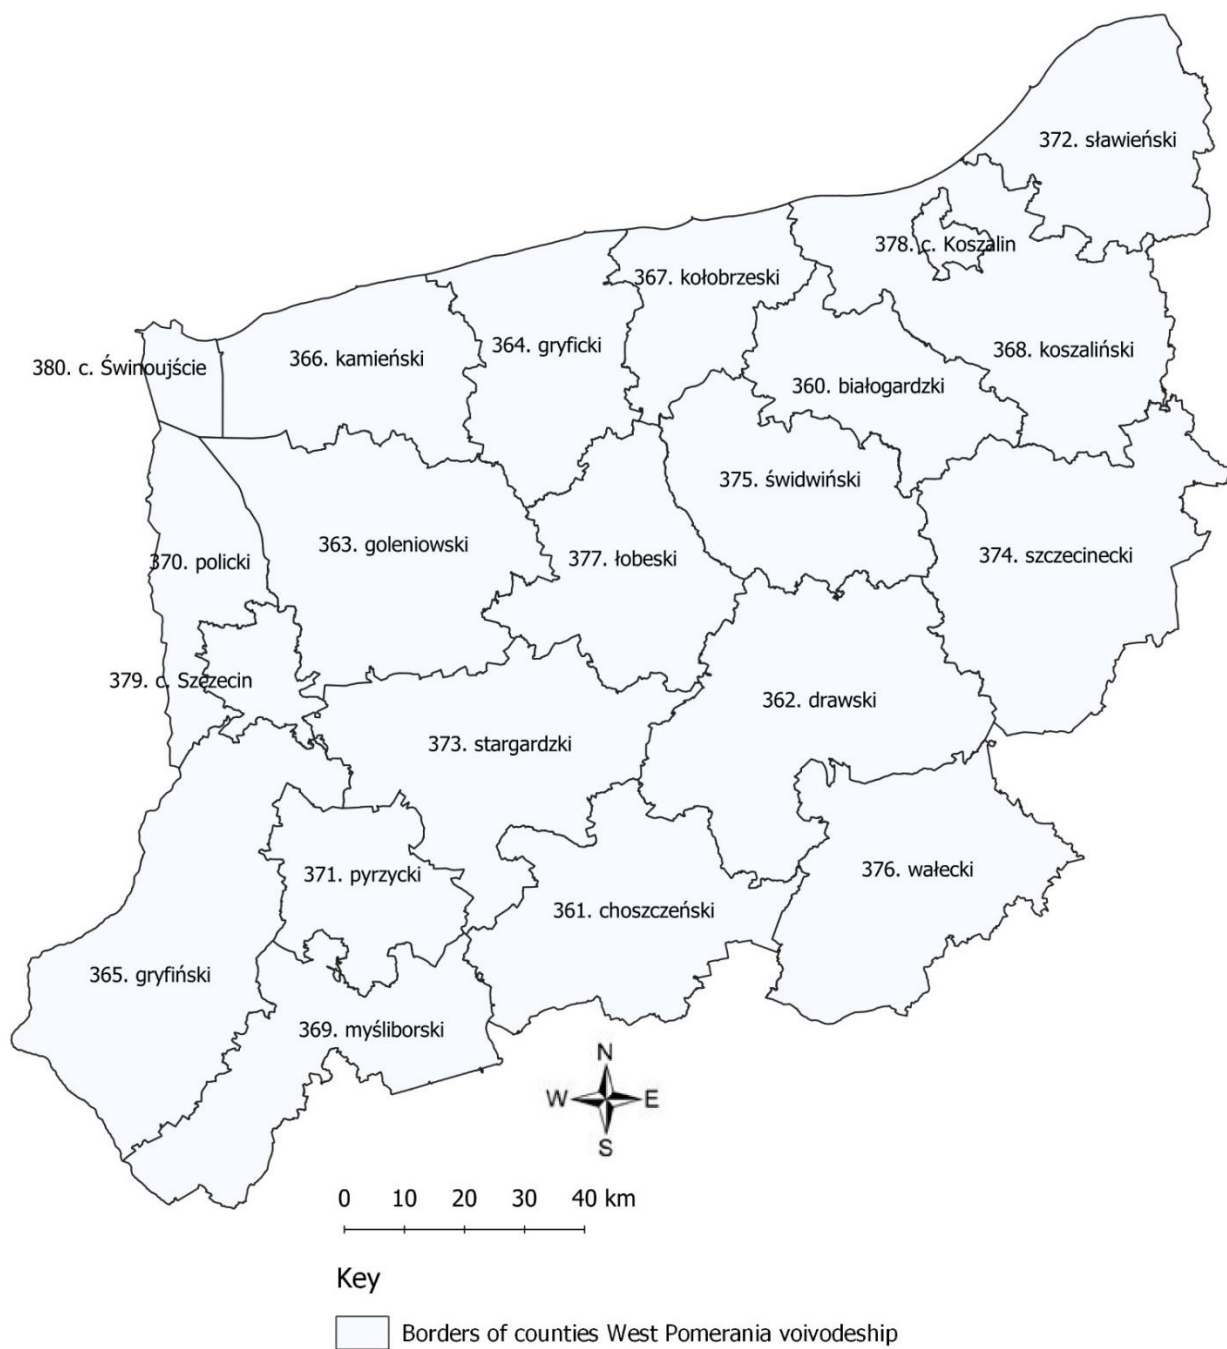

**Fig. 17.** Counties in West Pomerania voivodeship

*Source: Own elaboration*
